# Supplementary material for: Etiology, Risk Factors, and Diagnosis of Back Pain in Children and Adolescents: Evidence- and Consensus-Based Interdisciplinary Recommendations
Source: MDPI journal article supplement (doi:10.3390/children9020192), 2022-02-02
Supplement: s1 [file s1]

**Supplementary Table S1. Concomitant anamnestic and symptomatic findings for specific back pain recorded in different disease groups in childhood and adolescence.**

| Disease group                                                          | General symptoms, medical history                                                                                                                                          | Neurological symptoms                                                                                                                                                              | Other pain locations                                                                               | Local findings                                                                                                                                                                     | Other                                                                                                                            |
|------------------------------------------------------------------------|----------------------------------------------------------------------------------------------------------------------------------------------------------------------------|------------------------------------------------------------------------------------------------------------------------------------------------------------------------------------|----------------------------------------------------------------------------------------------------|------------------------------------------------------------------------------------------------------------------------------------------------------------------------------------|----------------------------------------------------------------------------------------------------------------------------------|
| Infectious disease                                                     | Fever, weakness                                                                                                                                                            | Gait or other movement disorder, radicular symptoms, bladder or bowel dysfunction                                                                                                  | Headache, abdominal or joint pain, myalgias                                                        | Local swelling, lymph node enlargement                                                                                                                                             | Cough, nausea, diarrhea                                                                                                          |
| Neoplasms/ spine tumors                                                | Fever                                                                                                                                                                      | Gait or movement disorder of the arms, radicular symptoms, bladder or bowel dysfunction                                                                                            | Abdominal, leg, or hip pain                                                                        | Lymph node enlargement, paravertebral swelling                                                                                                                                     | Pathologic fracture, respiratory insufficiency                                                                                   |
| Neoplasms / tumors of spinal cord, spinal nerves or paraspinal ganglia | Fever, respiratory insufficiency                                                                                                                                           | Weakness with movement disorder of extremities, radicular symptoms, bladder or bowel dysfunction, signs of meningitis, clonus, muscle spasms, changes of character, hallucinations | Extremity pain, headache, or joint pain                                                            |                                                                                                                                                                                    |                                                                                                                                  |
| Congenital structural diseases of the spine                            | Known syndromic or genetic disease                                                                                                                                         | Radicular symptoms, motor or sensory deficits of the extremities, bladder or bowel dysfunction                                                                                     | Thoracic or abdominal pain, gluteal, hip, leg, or joint pain, sprain pain, localized pressure pain | Dysraphia, disproportional growth, increase in scoliosis, kyphosis or lordosis, short trunk, asymmetry of pelvis or spine, torticollis, other deformities, palpable step deformity | Joint hypermobility, limitation of spinal flexion, load instability                                                              |
| Acquired structural diseases of the spine                              | Trauma, respiratory arrest after trauma, onset associated with athletic activity, glucocorticoid therapy, neoplasms or consumptive chronic diseases, respiratory disorders | Distal neurological deficits, radicular symptoms, bladder or bowel dysfunction                                                                                                     | Leg pain, gluteal and hip pain, thoracic and abdominal pain, joint pain, compression pain          | Local structural defects in the lumbosacral region, spinal deformity, short trunk, kyphosis, hyperlordosis, palpable step deformity                                                | Limitation of spinal flexion, pelvic tilt, pain on hyperextension, limited knee extension, load instability, joint hypermobility |

*Supplementary Table S1 continued*

Note: The symptoms are optional features for the different causes of the underlying diseases and are not obligatory.

| Disease group                           | General symptoms, medical history                                                                                                                                                                                     | Neurological symptoms                                                                                                                                                                                    | Other pain locations                                                                                      | Local findings                                                                                                    | Other                                                  |
|-----------------------------------------|-----------------------------------------------------------------------------------------------------------------------------------------------------------------------------------------------------------------------|----------------------------------------------------------------------------------------------------------------------------------------------------------------------------------------------------------|-----------------------------------------------------------------------------------------------------------|-------------------------------------------------------------------------------------------------------------------|--------------------------------------------------------|
| Neurological and neuromuscular diseases | Known cerebral palsy, spinal muscular atrophy, muscular dystrophy, dysraphia, neurofibromatosis, trauma or association with previous athletic activity, hemoglobinopathy                                              | Motor or sensory disorders of the extremities, bladder or bowel dysfunction, acute paraparesis or tetraplegia, radiculopathy, ipsilateral hemiplegia and contralateral sensory disorder, muscle weakness | Headache, extremity pain, radicular pain                                                                  | Progressive scoliosis                                                                                             |                                                        |
| Rheumatic and inflammatory diseases     | Known chronic inflammatory joint disease (JIA), vasculitis or autoinflammatory disease, juvenile dermatomyositis, uveitis, fever, weight loss                                                                         | Muscle weakness, gait disturbance                                                                                                                                                                        | Sprain pain, hip pain, arthralgia, bone pain of extremities, thoracic or abdominal pain, compression pain | Peripheral arthritis, sacroiliitis, enthesitis, dermal vasculitis, spinal motion restriction, scoliotic deformity | Uveitis, photosensitive dermatitis                     |
| Hematological and vascular diseases     | Known hematological disease (thalassemia, sickle cell disease), endocarditis, renal insufficiency, systemic lupus erythematoses, neurofibromatosis, cutaneous angiomas, glomerulonephritis, oral contraception, fever | Radicular pain, leg weakness to paraparesis, sensory disturbances of legs, speech disorder, bladder dysfunction                                                                                          | Thoracic, abdominal or flank pain, pelvic pain, acute bone pain, headache                                 | Progressive scoliosis                                                                                             | Arterial hypertension, vomiting                        |
| Abdominal or thoracic diseases          | Known cystic fibrosis, premenstrual development                                                                                                                                                                       | Urinary retention or urinary incontinence                                                                                                                                                                | Thoracic or abdominal pain, flank pain, extremity pain                                                    |                                                                                                                   | Arterial hypertension, constipation, vomiting, dyspnea |

## References: Chapter 3.1.1 Causes and red flags for specific back pain in childhood and adolescence

### Infectious diseases

1. Abrahamsson, K., Hansson, S., Jodal, U. & Lincoln, K. (1993). Staphylococcus saprophyticus urinary tract infections in children. *European Journal of Pediatrics*, 152(1), 69–71. <https://doi.org/10.1007/BF02072520>
2. Acham-Roschitz, B., Aberle, S. W., Pirker, N., Kaulfersch, W., Boehm, M., Roedl, S., Zenz, W., Ring, E. & MacHe, C. J. (2010). Nephropathia epidemica (puumala virus infection) in Austrian children. *Pediatric Infectious Disease Journal*, 29(9), 874–876. <https://doi.org/10.1097/INF.0b013e3181dfbbe5>
3. Ahlm, C., Settergren, B., Gothefors, L. & Juto, P. (1994). Nephropathia epidemica (hemorrhagic fever with renal syndrome) in children: Clinical characteristics. *Pediatric Infectious Disease Journal*, 13(1), 45–49.
4. Ahmad, M., Ekramullah, Ahmad, I. & Asmat Ali, S. (2012). A rare case of intradural spinal hydatid cyst in a paediatric patient. *Jbr-btr*, 95(2), 87–88.
5. Al-Rahawan, M. M., Gray, B. M., Mitchell, C. S. & Smith, S. D. (2012). Thoracic vertebral osteomyelitis with paraspinal mass and intraspinal extension: an atypical presentation of cat-scratch disease. *Pediatr Radiol*, 42(1), 116–119. <https://doi.org/10.1007/s00247-011-2087-2>
6. Araújo, K. C. G. M., Da Rosa E Silva, C., Barbosa, C. S. & Ferrari, T. C. A. (2006). Clinical-epidemiological profile of children with schistosomal myeloradiculopathy attended at the Instituto Materno-Infantil de Pernambuco. *Memorias do Instituto Oswaldo Cruz*, 101(SUPPL. 1), 149–156.
7. Balaji, G., Thimmaiah, S. & Menon, J. (2014). Brodie's abscess of the posterior ilium: A rare cause for low back pain in children. *BMJ Case Reports*. Scopus. <https://doi.org/10.1136/bcr-2014-204684>
8. Behera, G., Poduval, M., Patro, D. K. & Sahoo, S. (2017). Brodie's Abscess of Posterior Ilium with Gluteal Syndrome, an Unusual Cause of Paediatric Low Back Pain: A Case Report. *Malays Orthop J*, 11(2), 68–71. <https://doi.org/10.5704/moj.1707.009>
9. Bogdanovic, R., Gligic, A., Nikolic, V., Ognjanović, M., Marković, M. & Sarjanović, L. (1994). Belgrade and Hantaan hantaviruses - the causative agents of severe haemorrhagic fever with renal syndrome in children in Serbia. *Pediatric Nephrology*, 8(3), 299–303. <https://doi.org/10.1007/BF00866341>
10. Bolivar, R., Kohl, S. & Pickering, L. K. (1978). Vertebral osteomyelitis in children: report of four cases. *Pediatrics*, 62(4), 549–553.
11. Bonfiglio, M., Lange, T. A. & Min Kim, Y. (1973). Pyogenic vertebral osteomyelitis. Disk space infections. *Clin.orthop.*, No. 96, 234–247.
12. Brook, I. (2001). Two cases of diskitis attributable to anaerobic bacteria in children. *Pediatrics*, 107(2), E26.
13. Buoncristiani, A. M., McCullen, G., Shin, A. Y., Bathgate, B. & Akbarnia, B. A. (1998). An unusual cause of low back pain. Osteomyelitis of the spinous process. *Spine (Phila Pa 1976)*, 23(7), 839–841.
14. Callan, A. K., Bauer, J. M. & Martus, J. E. (2016). Deep Spine Infection after Acupuncture in the Setting of Spinal Instrumentation. *Spine Deformity*, 4(2), 156–161. <https://doi.org/10.1016/j.jspd.2015.09.045>
15. Celebi, S., Sevinir, B., Saraydaroglu, O., Gurpinar, A. & Hacimustafaoglu, M. (2009). Pulmonary actinomycosis. *Indian Journal of Pediatrics*, 76(2), 236–238. <https://doi.org/10.1007/s12098-008-0233-0>
16. Chen, P. Y., Chu, H. Y., Shian, W. J., Shu, S. G. & Chi, C. S. (1994). Varicella-zoster virus infection in children with malignancy. *Chinese Medical Journal (Taipei)*, 54(6), 417–423.
17. Choma, T., Burke, M., Kim, C. & Kakarlapudi, R. (2008). Epidural abscess as a delayed complication of spinal instrumentation in scoliosis surgery: A case of progressive neurologic dysfunction with complete recovery. *Spine*, 33(3), E76–E80. <https://doi.org/10.1097/BRS.0b013e31816245a6>
18. Dagli, C. E., Guler, E., Bakan, V., Atilla, N. & Koksai, N. (2009). Miliary tuberculosis accompanying paravertebral tuberculosis abscess in an adolescent. *J Infect Dev Ctries*, 3(5), 402–404.
19. Dean, D. (2014). Perirectal abscess masquerading as cauda equina syndrome in an otherwise healthy 12-year-old child. *Case Rep Emerg Med*, 2014, 817124. <https://doi.org/10.1155/2014/817124>
20. Demaerel, P., Crevits, I., Casteels-Van Daele, M. & Baert, A. L. (1998). Meningoradiculitis due to borreliosis presenting as low back pain only. *Neuroradiology*, 40(2), 126–127.
21. Donzelli, A., Samara, E., Spyropoulou, V., Juchler, C. & Ceroni, D. (2016). Pediatric Sacroiliitis: Clinical and Microbiologic Differences Between Infants and Children-Adolescents. *Pediatr Infect Dis J*. Vorab-Onlinepublikation. <https://doi.org/10.1097/inf.0000000000001502>
22. Dornbos, D., 3rd, Morin, J., Watson, J. R. & Pindrik, J. (2016). Thoracic osteomyelitis and epidural abscess formation due to cat scratch disease: case report. *J Neurosurg Pediatr*, 25(6), 713–716. <https://doi.org/10.3171/2016.7.peds1677>
23. Dutta, D., Sen, A., Gupta, D., Kuila, P., Chatterjee, D., Sanyal, S. & Das, S. (2018). Childhood Brucellosis in Eastern India. *Indian Journal of Pediatrics*, 85(4), 266–271. <https://doi.org/10.1007/s12098-017-2513-z>

24. Eisen, S., Honywood, L., Shingadia, D. & Novelli, V. (2012). Spinal tuberculosis in children. *Arch Dis Child*, 97(8), 724–729. <https://doi.org/10.1136/archdischild-2011-301571>
25. Elevli, M., Çivilibal, M., Duru, N. S., Şengül, H., Çölbay, G. & Erdoğan, Y. (2010). Two children with spinal tuberculosis associated with psoas abscess. *Cocuk Enfeksiyon Dergisi*, 4(3), 110–113. <https://doi.org/10.5152/ced.2010.16>
26. Fernandez, M., Carrol, C. L. & Baker, C. J. (2000). Discitis and vertebral osteomyelitis in children: An 18-year review. *Pediatrics*, 105(6), 1299–1304.
27. Fitzgerald, F., Howard, J., Bailey, F. & Soleimanian, S. (2013). Back pain in a previously healthy teenager. *BMJ Case Rep*, 2013. <https://doi.org/10.1136/bcr-2013-200139>
28. Giebaly, D. E., Horriat, S., Sinha, A. & Mangaleshkar, S. (2012). Pyomyositis of the piriformis muscle presenting with sciatica in a teenage rugby player. *BMJ Case Rep*, 2012. <https://doi.org/10.1136/bcr.12.2011.5392>
29. Goldsmith, D. P., Smergel, E. M., Chadarevian, J. P. de & Fisher, M. C. (1997). Vague back pain in a teenager. *J Clin Rheumatol*, 3(3), 140–143.
30. Haghighatkah, H., Jafroodi, Y., Taheri, M. S., Pourghorban, R. & Dehkordy, A. S. (2015). Multifocal skeletal tuberculosis mimicking langerhans cell histiocytosis in a child: A case report with a long-term follow-up. *Iranian Red Crescent Medical Journal*, 17(12). <https://doi.org/10.5812/ircmj.19942>
31. Heenan, S. D. & Britton, J. (1995). Septic arthritis in a lumbar facet joint: a rare cause of an epidural abscess. *Neuroradiology*, 37(6), 462–464.
32. Hernandez-Trujillo, H. S., Dalberg, T., Feder, H., Jr. & Smith, S. R. (2009). A fever of unknown origin workup in the emergency department reveals an unusual pathogen. *Pediatr Emerg Care*, 25(10), 684–686. <https://doi.org/10.1097/PEC.0b013e3181bec8df>
33. Hoffer, F. A., Strand, R. D. & Gebhardt, M. C. (1988). Percutaneous biopsy of pyogenic infection of the spine in children. *J Pediatr Orthop*, 8(4), 442–444.
34. Holliday Iii, P. O., Davis Jr, C. H. & Des Schaffner, L. (1980). Intervertebral disc space infection in a child presenting as a psoas abscess: Case report. *Neurosurgery*, 7(4), 395–397.
35. Homans, J., Khoo, L., Chen, T., Commins, D. L., Ahmed, J. & Kovacs, A. (2001). Spinal intramedullary cysticercosis in a five-year-old child: case report and review of the literature. *Pediatr Infect Dis J*, 20(9), 904–908.
36. Hotz, A., Hena, Z. & Gross, E. (2016). A case of back pain that wakes a child from sleep. *JAMA Pediatrics*, 170(11), 1101–1102. <https://doi.org/10.1001/jamapediatrics.2016.0454>
37. Hussain, S. & Rathore, M. H. (2007). Cat scratch disease with epidural extension while on antimicrobial treatment. *Pediatr Neurosurg*, 43(2), 164–166. <https://doi.org/10.1159/000098395>
38. Hütten, M. & Lassay, E. (2007). Low back pain in a 131/2 year old patient extending over several months. Diagnosis at second view. *Padiatrische Praxis*, 70(2), 335–342.
39. Ikem, I. C., Bamgboye, E. A. & Olasinde, A. A. (2001). Spinal tuberculosis: a 15 year review at OAUTHC Ile-Ife. *Niger Postgrad Med J*, 8(1), 22–25.
40. Jansen, B. R. H., Hart, W. & Schreuder, O. (1993). Discitis in childhood: 12-35-year follow-up of 35 patients. *Acta Orthopaedica*, 64(1), 33–36. <https://doi.org/10.3109/17453679308994523>
41. Kalkan, E., Cengiz, Ş. L., Çiçek, O., Erdi, F. & Baysefer, A. (2007). Primary spinal intradural extramedullar hydatid cyst in a child. *Journal of Spinal Cord Medicine*, 30(3), 297–300.
42. Kameda, G., Vieker, S., Hartmann, J., Niehues, T. & Langler, A. (2012). Diastolic heart murmur, nocturnal back pain, and lumbar rigidity in a 7-year girl: an unusual manifestation of lyme disease in childhood. *Case Rep Pediatr*, 2012, 976961. <https://doi.org/10.1155/2012/976961>
43. Kang, H. M., Choi, E. H., Lee, H. J., Yun, K. W., Lee, C. K., Cho, T. J., Cheon, J. E. & Lee, H. (2016). The etiology, clinical presentation and long-term outcome of spondylodiscitis in children. *Pediatric Infectious Disease Journal*, 35(4), e102–e106. <https://doi.org/10.1097/INF.0000000000001043>
44. Karadereler, S., Orakdogan, M., Kilic, K. & Ozdogan, C. (2002). Primary spinal extradural hydatid cyst in a child: case report and review of the literature. *Eur Spine J*, 11(5), 500–503. <https://doi.org/10.1007/s00586-002-0411-0>
45. Karli, A., Belet, N., Danaci, M., Avcu, G., Paksu, Ş., Köken, Ö. & Şensoy, G. (2014). Iliopsoas abscess in children: Report on five patients with a literature review. *Turkish Journal of Pediatrics*, 56(1), 69–74.
46. Keihani-Douste, Z., Daneshjou, K. & Ghasemi, M. (2006). A quadriplegic child with multiple brain abscesses: Case report of neurobrucellosis. *Medical Science Monitor*, 12(12), CS119–CS122.
47. Khan, S., Singh, N., Dow, A. & Ramirez-Zamora, A. (2015). Pediatric Acute Longitudinal Extensive Transverse Myelitis Secondary to Neuroborreliosis. *Case Rep Neurol*, 7(2), 162–166. <https://doi.org/10.1159/000438696>
48. King, I. C. C., Lawson, G. & Tourret, L. (2017). Atypical back pain in a child: Subcutaneous lumbar abscess associated with chickenpox. *Annals of Pediatric Surgery*, 13(1), 62–64. <https://doi.org/10.1097/01.XPS.0000489146.09928.13>
49. Kumar, R., Srivastava, A. K. & Tiwari, R. K. (2011). Surgical management of Pott's disease of the spine in pediatric patients: A single surgeon's experience of 8 years in a tertiary care center. *J Pediatr Neurosci*, 6(Suppl 1), S101–8. <https://doi.org/10.4103/1817-1745.85726>
50. Ladhani, S., Phillips, S. D. & Allgrove, J. (2002). Low back pain at presentation in a newly diagnosed diabetic. *Arch Dis Child*, 87(6), 543–544.
51. Lahat, E., Pillar, G., Ravid, S., Barzilai, A., Etzioni, A. & Shahar, E. (1998). Rapid recovery from transverse myelopathy in children treated with methylprednisolone. *Pediatric Neurology*, 19(4), 279–282. [https://doi.org/10.1016/S0887-8994\(98\)00065-4](https://doi.org/10.1016/S0887-8994(98)00065-4)

52. Lantsberg, S., Rachinsky, I., Levy, J. & Shulman, H. (2002). A pediatric patient with acute low-back and pelvis pain. *Seminars in Nuclear Medicine*, 32(3), 233–235. <https://doi.org/10.1053/snuc.2002.124182>
53. Liew, K. L., Choong, C. S., Liu, P. N., Tsai, D. H., Chen, L. H. & Yang, W. C. (1998). Pyomyositis in childhood: a case report. *Zhonghua Yi Xue Za Zhi (Taipei)*, 61(8), 488–491.
54. Lighter, J., Kim, M. & Krasinski, K. (2008). Intramedullary schistosomiasis presenting in an adolescent with prolonged intermittent back pain. *Pediatr Neurol*, 39(1), 44–47. <https://doi.org/10.1016/j.pediatrneurol.2008.03.016>
55. Lim, S. W., Lim, H. Y., Kannaiah, T. & Zuki, Z. (2017). Streptococcus Constellatus Spondylodiscitis in a Teenager: A Case Report. *Malays Orthop J*, 11(3), 50–52. <https://doi.org/10.5704/moj.1711.004>
56. Limaïem, F., Bellil, S., Bellil, K., Chelly, I., Mekni, A., Khaldi, M., Haouet, S., Zitouna, M. & Kchir, N. (2010). Primary hydatidosis of the central nervous system: A retrospective study of 39 Tunisian cases. *Clinical Neurology and Neurosurgery*, 112(1), 23–28. <https://doi.org/10.1016/j.clineuro.2009.09.001>
57. Lipsett, S. C. & Neuman, M. I. (2016). Young Child With Abdominal and Back Pain. *Ann Emerg Med*, 68(6), 780–792. <https://doi.org/10.1016/j.annemergmed.2016.04.012>
58. Menelaus, M. B. (1964). DISCITIS. AN INFLAMMATION AFFECTING THE INTERVERTEBRAL DISCS IN CHILDREN. *J Bone Joint Surg Br*, 46, 16–23.
59. Miller, J. H. & Gates, G. F. (1977). Scintigraphy of Sacroiliac Pyarthrosis in Children. *JAMA: The Journal of the American Medical Association*, 238(25), 2701–2704. <https://doi.org/10.1001/jama.1977.03280260031012>
60. Morgan, E. R. & Smalley, L. A. (1983). Varicella in immunocompromised children. Incidence of abdominal pain and organ involvement. *Am J Dis Child*, 137(9), 883–885.
61. Muñiz, A. E. & Evans, T. (2000). Chronic paronychia, osteomyelitis, and paravertebral abscess in a child with blastomycosis. *Journal of Emergency Medicine*, 19(3), 245–248. [https://doi.org/10.1016/S0736-4679\(00\)00243-2](https://doi.org/10.1016/S0736-4679(00)00243-2)
62. Myojin, S., Kamiyoshi, N. & Kugo, M. (2018). Pyogenic spondylitis and paravertebral abscess caused by Salmonella Saintpaul in an immunocompetent 13-year-old child: A case report. *BMC Pediatrics*, 18(1). <https://doi.org/10.1186/s12887-018-1010-5>
63. Nagashima, H., Morio, Y., Nishi, T., Hagino, H. & Teshima, R. (2002). Spontaneous fusion of isthmic spondylolisthesis after discitis: A case report. *Clin Orthop Relat Res*(403), 104–107.
64. Narayan, V., Mohammed, N., Savardekar, A. R., Patra, D. P. & Nanda, A. (2018). Tuberculous spondylolisthesis: a re-appraisal on clinico-radiologic spectrum and surgical treatment paradigm. *World Neurosurg*. Vorab-Onlinepublikation. <https://doi.org/10.1016/j.wneu.2018.02.157>
65. Nayil, K., Ramzan, A., Wani, A., Nizami, F. & Makhdoomi, R. (2012). Brucella spinal abscess in a teenager. *Neurosurgery Quarterly*, 22(4), 253–254. <https://doi.org/10.1097/WNQ.0b013e3182592dd6>
66. Oberdorfer, P., Kongthavonsakul, K. & Lochungvu, H. P. (2012). A 3-year-old boy with kyphosis, back mass and weakness. *BMJ Case Rep*, 2012. <https://doi.org/10.1136/bcr.02.2012.5918>
67. Papaliodis, D. N., Roberts, T. T., Richardson, N. G. & Lawrence, J. B. (2014). Spontaneous septic arthritis of the lumbar facet caused by methicillin-resistant Staphylococcus aureus in an otherwise healthy adolescent. *Am J Orthop (Belle Mead NJ)*, 43(7), 325–327.
68. Peter, J. C., Kieck, C. F. & Villiers, J. C. de (1992). Acute spinal epidural abscess. *Pediatric Surgery International*, 7(4), 284–288. <https://doi.org/10.1007/BF00183982>
69. Reinehr, T., Burk, G. & Andler, W. (1999) [Spondylodiscitis in childhood]. *Klin Padiatr*, 211(5), 406–409. <https://doi.org/10.1055/s-2008-1043821> (Erstveröffentlichung Die Spondylodiszitis im Kindesalter.)
70. Reiss-Zimmermann, M., Hirsch, W., Schuster, V., Wojan, M. & Sorge, I. (2010). Pyogenic osteomyelitis of the vertebral arch in children. *J Pediatr Surg*, 45(8), 1737–1740. <https://doi.org/10.1016/j.jpedsurg.2010.04.010>
71. Richards, A. L., Bagus, R., Baso, S. M., Follows, G. A., Tan, R., Graham, R. R., Sandjaja, B., Corwin, A. L. & Punjabi, N. (1997). The first reported outbreak of dengue hemorrhagic fever in Irian Jaya, Indonesia. *American Journal of Tropical Medicine and Hygiene*, 57(1), 49–55.
72. Rockney, R., Ryan, R. & Knuckey, N. (1989). Spinal epidural abscess. An infectious emergency. Case report and review. *Clin Pediatr (Phila)*, 28(7), 332–334.
73. Rook, J. L., Duffey, D. & DeRoos, S. (2011). A case of autonomically mediated pain due to spinal epidural abscess in an adolescent female. *Pediatric Emergency Care*, 27(6), 530–532. <https://doi.org/10.1097/PEC.0b013e31821d86d5>
74. Rubin, R. C., Jacobs, G. B., Cooper, P. R. & Wille, R. L. (1977). Disc space infections in children. *Childs Brain*, 3(3), 180–190.
75. Ruddy, J. M., Dodson, T. F. & Duwayri, Y. (2014). Open repair of superior mesenteric artery mycotic aneurysm in an adolescent girl. *Annals of Vascular Surgery*, 28(4), 1032.e21–1032.e24. <https://doi.org/10.1016/j.avsg.2013.08.009>
76. Rudolph, H., Prieto Dernbach, R., Walka, M., Rey-Hinterkopf, P., Melichar, V., Muschiol, E., Schweitzer-Krantz, S., Richter, J. W., Weiss, C., Böttcher, S., Diedrich, S., Schrotten, H. & Tenenbaum, T. (2017). Comparison of clinical and laboratory characteristics during two major paediatric meningitis outbreaks of echovirus 30 and other non-polio enteroviruses in Germany in 2008 and 2013. *European Journal of Clinical Microbiology and Infectious Diseases*, 36(9), 1651–1660. <https://doi.org/10.1007/s10096-017-2979-7>

77. Rurnana, M., Mahadevan, A., Khurshid, M. N., Kovoor, J. M.E., Yasha, T. C., Santosh, V., Indira, B. & Shankar, S. K. (2006). Cestode parasitic infestation: intracranial and spinal hydatid disease—a clinicopathological study of 29 cases from South India. *Clinical Neuropathology*, 25(2).
78. Sarmah, P., Hanumanthappa, A. R. & Chandrappa, N. R. (2014). Serodiagnosis and clinical profile of dengue virus infection in patients presenting to a tertiary care hospital. *Journal of Pure and Applied Microbiology*, 8(4), 3209–3212.
79. Sayana, M. K., Chacko, A. J. & Mc Givney, R. C. (2003). Unusual cause of infective discitis in an adolescent. *Postgrad Med J*, 79(930), 237–238.
80. Sayi, E. N. & Mlay, S. M. (1995). Tuberculosis of the spine in children at Muhimbili Medical Centre, Dar es Salaam. *East Afr Med J*, 72(1), 46–48.
81. Shah, S. S., Goregaonkar, A. A. & Goregaonkar, A. B. (2017). Extensively Drug-resistant Tuberculosis of the Lumbar Spine in a Six-year-old Child: A Case Report. *J Orthop Case Rep*, 7(2), 40–43. <https://doi.org/10.13107/jocr.2250-0685.742>
82. Shukla, S. K., Sharma, V., Singh, K. & Trivedi, A. (2010). Primary lumbosacral intradural hydatid cyst in a child. *J Neurosci Rural Pract*, 1(2), 109–111. <https://doi.org/10.4103/0976-3147.71727>
83. Sinatra, P. M. & Alander, D. H. (2015). Lemierre Disease: A Case With Multilevel Epidural Abscess and Aggressive Neurological Weakness: Case Report and Literature Review. *Journal of Pediatric Orthopaedics*. Scopus. <https://doi.org/10.1097/BPO.0000000000000652>
84. Singh, J., Khare, S., Prasad, A. K., Garg, A., Singh, N. P. & Sharma, R. S. (1994). An outbreak of influenza A (H3N2) in Delhi, 1993. *J Commun Dis*, 26(1), 14–18.
85. Solano, J., Winningham, G., Al Zubeidi, D. & Myers, A. (2016). A 5-year-old with fever, headache, neck stiffness, and leg pain. *Pediatrics*, 138(5). <https://doi.org/10.1542/peds.2015-3762>
86. Spinola, S. M., Bell, R. A. & Henderson, F. W. (1981). Actinomyces. A cause of pulmonary and mediastinal mass lesions in children. *Am J Dis Child*, 135(4), 336–339.
87. Strober, J. B., Zuppa, A., Brooks-Kayal, A. R. & Ross, K. (1999). A 15-year-old with back pain, fever, and leg numbness. *Seminars in Pediatric Neurology*, 6(3), 190–195. [https://doi.org/10.1016/S1071-9091\(99\)80012-6](https://doi.org/10.1016/S1071-9091(99)80012-6)
88. Tannous, R. & Grose, C. (2011). Calculation of the anterograde velocity of varicella-zoster virions in a human sciatic nerve during shingles. *Journal of Infectious Diseases*, 203(3), 324–326. <https://doi.org/10.1093/infdis/jiq068>
89. Tassinari, D., Forti, S., Torella, M. & Tani, G. (2013). A special case of lower back pain in a 3-year-old girl. *BMJ Case Reports*. Scopus C7 - 4796. <https://doi.org/10.1136/bcr.09.2011.4796>
90. Tomaszewski, D. & Avella, D. (1999). Vertebral osteomyelitis in a high school hockey player: A case report. *J Athl Train*, 34(1), 29–33.
91. Vergori, A., Cerase, A., Migliorini, L., Pluchino, M. G., Oliveri, G., Arrigucci, U., Luca, A. de & Montagnani, F. (2015). Pediatric spinal epidural abscess in an immunocompetent host without risk factors: Case report and review of the literature. *IDCases*, 2(4), 109–115. <https://doi.org/10.1016/j.idcr.2015.09.008>
92. Williams, T. M. & Conrad, D. A. (2002). Spinal abscess and chronic lobar atelectasis in a 6-year-old boy. *Infections in Medicine*, 19(9), 425–427+435.
93. Wolfe, M. W. & Bennett, J. T. (1997). Pyomyositis with toxic shock syndrome presenting as back pain and fever: a case report and literature review. *Am J Orthop (Belle Mead NJ)*, 26(2), 135–137.
94. Wu, S. Y., Wei, T. A. S., Chen, Y. C. & Huang, S. W. (2012). Vertebral osteomyelitis complicated by iliopsoas muscle abscess in an immunocompetent adolescent: Successful conservative treatment. *Orthopedics*, 35(10), e1576–e1580. <https://doi.org/10.3928/01477447-20120919-34>
95. Yazici, N., Yalçın, B., Cila, A., Alnay, A. & Büyükpamukçu, M. (2005). Discitis following lumbar puncture in non-Hodgkin lymphoma. *Pediatric Hematology and Oncology*, 22(8), 689–694. <https://doi.org/10.1080/08880010500278764>
96. Yea, C., Bitnun, A., Robinson, J., Mineyko, A., Barton, M., Mah, J. K., Vajsar, J., Richardson, S., Licht, C., Brophy, J., Crone, M., Desai, S., Hukin, J., Jones, K., Muir, K., Pernica, J. M., Pless, R., Pohl, D., Rafay, M. F., . . . Yeh, E. A. (2017). Longitudinal Outcomes in the 2014 Acute Flaccid Paralysis Cluster in Canada. *Journal of Child Neurology*, 32(3), 301–307. <https://doi.org/10.1177/0883073816680770>
97. Yigit, O., Erol, M., Gayret, O. B., Ustun, I. & Ulas, S. (2016). Coexistence of a ghon complex, pott's disease, and hip arthritis in a child. *Iranian Red Crescent Medical Journal*, 18(7). <https://doi.org/10.5812/ircmj.29800>
98. Yildiz, B., Şen, S., Bal, Z. Ş., Erdöan, D. D., Korkmaz, M. & Vardar, F. (2013). Epidemiological, laboratory and clinical Features of childhood hydatid disease. *Cocuk Enfeksiyon Dergisi*, 7(2), 53–56. <https://doi.org/10.5152/ced.2013.15>
99. Yilmaz, B., Ozdemir, G., Aktas, E., Komur, B., Alfidan, S., Memisoglu, S. & Duymus, T. M. (2016). Brucellosis Suspicion is the Most Important Criterion for Diagnosis Particularly in Endemic Regions. *Open Orthop J*, 10, 7–11. <https://doi.org/10.2174/1874325001610010007>
100. Yoo, K. H. & Choi, Y. (1994). Haemorrhagic fever with renal syndrome in Korean children. *Pediatric Nephrology*, 8(5), 540–544. <https://doi.org/10.1007/BF00858120>

101. Abbas, A. A. H., Felimban, S. K., Husain, A. H., Fryer, C. J. H. & Baker, D. L. (2004). Back pain due to osteoporosis in children treated for acute lymphoblastic leukaemia: Clinical - Radiological manifestations and treatment. *Haema*, 7(1), 92–97.
102. Akeda, K., Kasai, Y., Kawakita, E., Seto, M., Kono, T. & Uchida, A. (2009). Primary Ewing sarcoma of the spine mimicking a psoas abscess secondary to spinal infection. *Spine*, 34(9), E337–E341. <https://doi.org/10.1097/BRS.0b013e3181995ec2>
103. Al Maqdashy, E. G. & Bakdash, M. M. (2005). Osteoid osteoma of the spine is an important cause of back pain: Two cases and review. *Qatar Medical Journal*, 14(2), 48–51.
104. Alos, N., Grant, R. M., Ramsay, T., Halton, J., Cummings, E. A., Miettinen, P. M., Abish, S., Atkinson, S., Barr, R., Cabral, D. A., Cairney, E., Couch, R., Dix, D. B., Fernandez, C. V., Hay, J., Israels, S., Laverdiere, C., Lentle, B., Lewis, V., . . . Ward, L. M. (2012). High incidence of vertebral fractures in children with acute lymphoblastic leukemia 12 months after the initiation of therapy. *J Clin Oncol*, 30(22), 2760–2767. <https://doi.org/10.1200/jco.2011.40.4830>
105. Alqahtani, A., Amer, R. & Bakhsh, E. (2017). Primary Occipital Ewing's Sarcoma with Subsequent Spinal Seeding. *Case Rep Pediatr*, 2017, 1521407. <https://doi.org/10.1155/2017/1521407>
106. Amacher, A. L. & Eltomey, A. (1985). Spinal osteoblastoma in children and adolescents. *Child's Nervous System*, 1(1), 29–32. <https://doi.org/10.1007/BF00706727>
107. Andersson, C., Österlundh, G., Enlund, F., Kindblom, L. G. & Hansson, M. (2014). Primary spinal intradural mesenchymal chondrosarcoma with detection of fusion gene HEY1-NCOA2: A paediatric case report and review of the literature. *Oncology Letters*, 8(4), 1608–1612. <https://doi.org/10.3892/ol.2014.2364>
108. Antillon, F., Behm, F. G., Raimondi, S. C., Kaste, S. C., Sandlund, J. T. & Pappo, A. S. (1998). Pediatric primary diffuse large cell lymphoma of bone with t(3;22)(q27;q11). *J Pediatr Hematol Oncol*, 20(6), 552–555.
109. Ardern-Holmes, S., Esrick, E., Degar, B., Vergilio, J. A. & Ullrich, N. J. (2011). Back pain and spinal cord compression: An uncommon presentation of childhood acute myeloid leukemia. *Journal of Pediatric Neurology*, 9(1), 109–113. <https://doi.org/10.3233/JPN-2010-0443>
110. Aston, J. W., Jr. (1990). Pediatric update #16. The orthopaedic presentation of neuroblastoma. *Orthop Rev*, 19(10), 929–932.
111. Atas, E., Kesik, V., Kismet, E. & Koseoglu, V. (2013). Primary vertebral lymphoma presenting with fracture. *Indian Pediatr*, 50(5), 512–513.
112. Avadhanam, P. K., Vuyyur, S. & Panigrahi, M. K. (2010). A rare occurrence of osteoblastoma in a child. *J Pediatr Neurosci*, 5(2), 153–156. <https://doi.org/10.4103/1817-1745.76118>
113. Aydeniz, A., Erkuğlu, I., Altındağ, Ö., Küçükoglu, B. & Gürsoy, S. (2010). Severe neck and back pain in adolescence: Remember osteoblastoma. *Rheumatology International*, 30(9), 1243–1244. <https://doi.org/10.1007/s00296-009-1048-7>
114. Aysun, S., Topcu, M., Günay, M. & Topaloğlu, H. (1994). Neurologic features as initial presentations of childhood malignancies. *Pediatric Neurology*, 10(1), 40–43. [https://doi.org/10.1016/0887-8994\(94\)90065-5](https://doi.org/10.1016/0887-8994(94)90065-5)
115. Azarpira, N., Javadi, F. & Safarian, A. (2015). Giant cell tumor of the thoracic vertebra: A case report. *Neurosurgery Quarterly*, 25(2), 264–266. <https://doi.org/10.1097/WNQ.0000000000000040>
116. Balachandran, H., Sneha, L. M., Menon, G. & Scott, J. (2017). Langerhans cell histiocytosis as an unusual cause of back pain in a child: A case report and review of literature. *Journal of Craniovertebral Junction and Spine*, 8(4), 384–386. [https://doi.org/10.4103/jcvjs.JCVJS\\_105\\_17](https://doi.org/10.4103/jcvjs.JCVJS_105_17)
117. Band, M. E., Sheldon, C., Brancato, J., Parikh, N. S. & D'Alessandri-Silva, C. (2016). A 17-year-old with steroid-resistant nephrotic syndrome. *Pediatrics*, 137(5). <https://doi.org/10.1542/peds.2015-3205>
118. Beckers, R., Uyttebroeck, A. & Demaerel, P. (2002). Acute lymphoblastic leukaemia presenting with low back pain. *Eur J Paediatr Neurol*, 6(5), 285–287.
119. Bjerregaard, L. L. & Rosthøj, S. (2002). Vertebral compression and eosinophilia in a child with acute lymphatic leukemia. *J Pediatr Hematol Oncol*, 24(4), 313–315.
120. Boretz, R. S. & Lonner, B. S. (2002). Atypical presentation of an osteoid osteoma in a child. *American journal of orthopedics (Belle Mead, N.J.)*, 31(6), 347–348.
121. Bowers, D. C., Griffith, T., Gargan, L., Cochran, C. J., Kleiber, B., Foxwell, A., Farrow-Gillespie, A., Orlino, A. & Germann, J. N. (2012). Back pain among long-term survivors of childhood leukemia. *J Pediatr Hematol Oncol*, 34(8), 624–629. <https://doi.org/10.1097/MPH.0b013e31827080de>
122. Brown, C. W., Jarvis, J. G., Letts, M. & Carpenter, B. (2005). Treatment and outcome of vertebral Langerhans cell histiocytosis at the Children's Hospital of Eastern Ontario. *Canadian Journal of Surgery*, 48(3), 230–236.
123. Caksen, H., Odabas, M., Kiymaz, N., Anlar, O., Unal, O. & Ugras, S. (2004). A case of metastatic spinal Ewing's sarcoma misdiagnosed as brucellosis and transverse myelitis. *Neurol Sci*, 24(6), 414–416. <https://doi.org/10.1007/s10072-003-0199-7>
124. Chakrapani, S. D., Grim, K., Kaimaktchiev, V. & Anderson, J. C. (2008). Osteoblastoma of the spine with discordant magnetic resonance imaging and computed tomography imaging features in a child. *Spine (Phila Pa 1976)*, 33(25), E968–70. <https://doi.org/10.1097/BRS.0b013e31818a0271>
125. Chen, S. H., Huang, T. J., Hsueh, S., Lee, Y. Y. & Hsu, R. W. (2002). Unusual bleeding of aneurysmal bone cyst in the upper thoracic spine. *Chang Gung Med J*, 25(3), 183–189.
126. Choi, S. W., Shin, S. J., Nam, K. W., Seo, K. B. & Kim, G. M. (2012). Primary Ewing sarcoma of lumbar spine in an 8-year-old boy: A case report. *Journal of Pediatric Orthopaedics Part B*, 21(4), 322–324. <https://doi.org/10.1097/BPB.0b013e318351b907>

127. Clark, A. & Stanish, W. D. (1985). An unusual cause of back pain in a young athlete. A case report. *Am J Sports Med*, 13(1), 51–54.
128. Codd, P. J., Riesenburger, R. I., Klimo Jr, P., Slotkin, J. R. & Smith, E. R. (2006). Vertebra plana due to an aneurysmal bone cyst of the lumbar spine. Case report and review of the literature. *Journal of Neurosurgery*, 105 PEDIATRICS(SUPPL. 6), 490–495.
129. D'Angelo, P., Conter, V., Di Chiara, G., Rizzari, C., Memeo, A. & Barigozzi, P. (1993). Severe osteoporosis and multiple vertebral collapses in a child during treatment for B-ALL. *Acta Haematol*, 89(1), 38–42.
130. Das, A., Nobil, F., Banik, G. & Kahhar, M. A. (2016). Vertebral compression fractures as a presenting feature of acutelymphoblastic leukemia. *Journal of Medicine (Bangladesh)*, 17(2), 120–121. <https://doi.org/10.3329/jom.v17i2.30078>
131. Dashti, A. S., Abdolkarimi, B., Safaei, A., Dehghanian, A. R. & Bazrafshan, A. (2016). Bilateral irritable hip: A rare presentation of leukemia in children. *Archives of Pediatric Infectious Diseases*, 4(3). <https://doi.org/10.5812/pedinfect.28388>
132. De La Serna, Francisco Javier, Martinez, M. A., Valdes, M. D., Hornedo, J., Mestre, M. J. & Morales, J. M. (1988). Rhabdomyosarcoma presenting with diffuse bone marrow involvement, hypercalcemia and renal failure. *Medical and Pediatric Oncology*, 16(2), 123–127.
133. Denis, F. & Armstrong, G. W. (1984). Scoliotogenic osteoblastoma of the posterior end of the rib. A case report. *Spine (Phila Pa 1976)*, 9(1), 74–76.
134. Dho, Y. S., Kim, H., Wang, K. C., Kim, S. K., Lee, J. Y., Shin, H. Y., Park, K. D., Kang, H. J., Kim, I. H., Park, S. H. & Phi, J. H. (2018). Pediatric Spinal Epidural Lymphoma Presenting with Compressive Myelopathy: A Distinct Pattern of Disease Presentation. *World Neurosurgery*. Scopus. <https://doi.org/10.1016/j.wneu.2018.03.059>
135. Diniz, R. E., Goldenberg, J., Carvalho, J. C. de, Gomes, C. E., Goldenberg, E. D. & Sementille, A. (1995). Lymphoma of unknown origin located in paravertebral muscles: an unusual cause of low back pain in children. *Sao Paulo Med J*, 113(4), 953–956.
136. Dogan, S., Leković, G. P., Theodore, N., Horn, E. M., Eschbacher, J. & Rekate, H. L. (2009). Primary thoracolumbar Ewing's sarcoma presenting as isolated epidural mass. *Spine Journal*, 9(1), e9–e14. <https://doi.org/10.1016/j.spinee.2007.11.003>
137. Doss, V. T., Weaver, J., Didier, S. & Arthur, A. S. (2014). Serial endovascular embolization as stand-alone treatment of a sacral aneurysmal bone cyst. *J Neurosurg Spine*, 20(2), 234–238. <https://doi.org/10.3171/2013.11.spine.13412>
138. Duncan, R. A. & Hewson, G. C. (2005). Back pain in children: dig a bit deeper. *Eur J Emerg Med*, 12(6), 317–319.
139. Eder, K. M., Holl, K. & Pumberger, W. (2016). Osteoblastoma of a thoracic vertebra as a differential diagnosis of back pain. *Monatsschrift fur Kinderheilkunde*, 164(1), 47–51. <https://doi.org/10.1007/s00112-015-3407-7>
140. Ellenberg, L., Kellerman, J., Dash, J., Higgins, G. & Zeltzer, L. (1980). Use of hypnosis for multiple symptoms in an adolescent girl with leukemia. *J Adolesc Health Care*, 1(2), 132–136.
141. Garling, R. J., Singh, R., Harris, C. & Haridas, A. (2018). Intradural lumbosacral malignant extrarenal rhabdoid tumor: a case report. *Child's Nervous System*, 34(1), 165–167. <https://doi.org/10.1007/s00381-017-3571-2>
142. Greene, S., Hawkins, D. S., Rutledge, J. C., Tsuchiya, K. D., Douglas, J., Ellenbogen, R. G. & Avellino, A. M. (2006). Pediatric intradural extramedullary synovial sarcoma: case report. *Neurosurgery*, 59(6), E1339; discussion E1339. <https://doi.org/10.1227/01.neu.0000245619.24603.96>
143. Hafiz, M. G., Islam, A. & Siddique, R. (2010). Back pain and vertebral compression: an unusual presentation of childhood acute lymphoblastic leukemia. *Mymensingh Med J*, 19(1), 130–136.
144. Hardasmalani, M. D., Naim, F. A., Kroning, D. & Bithoney, W. G. (2003). Emergency department presentations of a rare tumor - Extrasosseous cervical paraspinal Ewing's sarcoma. *Journal of Emergency Medicine*, 24(3), 271–275. [https://doi.org/10.1016/S0736-4679\(02\)00748-5](https://doi.org/10.1016/S0736-4679(02)00748-5)
145. Hoyoux, C., Forget, P., Piette, C., Dresse, M. F., Florkin, B., Rausin, L. & Thiry, A. (2012). Paravertebral Burkitt's Lymphoma in a Child: An Unusual Presentation. *Case Rep Med*, 2012, 891714. <https://doi.org/10.1155/2012/891714>
146. Huang, W. D., Yang, X. H., Wu, Z. P., Huang, Q., Xiao, J. R., Yang, M. S., Zhou, Z. H., Yan, W. J., Song, D. W., Liu, T. L. & Jia, N. Y. (2013). Langerhans cell histiocytosis of spine: A comparative study of clinical, imaging features, and diagnosis in children, adolescents, and adults. *Spine Journal*, 13(9), 1108–1117. <https://doi.org/10.1016/j.spinee.2013.03.013>
147. Igrutinovic, Z., Medovic, R., Markovic, S., Kostic, G., Raskovic, Z., Tanaskovic-Nestorovic, J., Radovanovic, M. & Vuletic, B. (2016). Rosai–Dorfman disease of vertebra: Case report and literature review. *Turkish Journal of Pediatrics*, 58(5), 566–571. <https://doi.org/10.24953/turkjped.2016.05.020>
148. Kar, A., Das, U., Parija, N. C. & Rout, N. (2014). Cytodiagnosis of metastatic Ewing's sarcoma of orbital mass and its confirmation by demonstration of EWS/friend leukemia integration 1 fusion gene. *Journal of Cytology*, 31(1), 44–46. <https://doi.org/10.4103/0970-9371.130700>
149. Kayser, R., Mahlfeld, K., Nebelung, W. & Graßhoff, H. (2000). Vertebral collapse and normal peripheral blood cell count at the onset of acute lymphatic leukemia in childhood. *Journal of Pediatric Orthopaedics Part B*, 9(1), 55–57.
150. Kebudi, R., Ayan, I., Tokuc, G., Darendeliler, E. & Bilge, N. (1998). Epidural spinal cord compression in children with solid tumors. *International Journal of Pediatric Hematology/Oncology*, 5(5), 373–377.



151. Kehl, D. K., Alonso, J. E. & Lovell, W. W. (1983). Scoliosis secondary to an osteoid-osteoma of the rib. A case report. *Journal of Bone and Joint Surgery - Series A*, 65(5), 701–703.
152. Khalatbari, M. R., Jalaiekhoo, H., Hamidi, M. & Moharamzad, Y. (2012). Primary spinal epidural rhabdomyosarcoma: A case report and review of the literature. *Child's Nervous System*, 28(11), 1977–1980. <https://doi.org/10.1007/s00381-012-1822-9>
153. Khan, I. S., Thakur, J. D., Chittiboina, P. & Nanda, A. (2012). Large sacral osteoblastoma: a case report and review of multi-disciplinary management strategies. *J La State Med Soc*, 164(5), 251–255.
154. Kim, H. S., Lee, J. E., Jung, S. S., Chon, J., Yoon, D. H., Park, Y. K. & Cho, E. H. (2013). Spinal cord injury due to the giant cell tumor of the second thoracic vertebra: A case report. *Annals of Rehabilitation Medicine*, 37(2), 269–273. <https://doi.org/10.5535/arm.2013.37.2.269>
155. Kobayashi, S., Takahashi, J., Sakashita, K., Fukushima, M. & Kato, H. (2013). Ewing sarcoma of the thoracic epidural space in a young child. *Eur Spine J*, 22 Suppl 3, S373–9. <https://doi.org/10.1007/s00586-012-2481-y>
156. Küpeli, S., Kara, F., Akyüz, C. & Büyükpamukçu, M. (2010). Eosinophilia and multifocal vertebral involvement with Hodgkin lymphoma. *Pediatric Blood and Cancer*, 55(3), 560–561. <https://doi.org/10.1002/pbc.22493>
157. Latha, M. S., Thirugnanasambandam, R. P., Venkatraman, P. & Scott, J. X. (2017). Back pain: An unusual manifestation of acute lymphoblastic leukemia - A case report and review of literature. *J Family Med Prim Care*, 6(3), 657–659. <https://doi.org/10.4103/2249-4863.222020>
158. Lefton, D. R., Torrisi, J. M. & Haller, J. O. (2001). Vertebral osteoid osteoma masquerading as a malignant bone or soft-tissue tumor on MRI. *Pediatr Radiol*, 31(2), 72–75. <https://doi.org/10.1007/s002470000378>
159. Leonard, M. & McCormack, D. (2006). Solitary eosinophilic granuloma causing spinal cord compression in a child presenting with abdominal pain. *European Journal of Orthopaedic Surgery and Traumatology*, 16(4), 348–350. <https://doi.org/10.1007/s00590-006-0092-1>
160. Lmejjati, M., El Attar, H., Layadi, F., Belaabidia, B. & Ali, S. A. B. (2007). Primary Ewing sarcoma of the vertebral column: Case report and literature review. *Journal of Pediatric Neurology*, 5(3), 251–254.
161. Louis-Ugbo, J., Reddy, A. S. & Heller, J. G. (1998). Delayed radiographic diagnosis of osteoid osteoma in the lumbar spine. *Neuro-Orthopedics*, 23(1-2), 1–8.
162. Marin, J. R. (2007). A Teenage Girl with Acute Back Pain. *Clinical Pediatric Emergency Medicine*, 8(1), 65–68. <https://doi.org/10.1016/j.cpem.2007.02.007>
163. Marushima, A., Matsumaru, Y., Suzuki, K., Takigawa, T., Kujiraoka, Y., Anno, I. & Matsumura, A. (2009). Selective arterial embolization with n-butyl cyanoacrylate in the treatment of aneurysmal bone cyst of the thoracic vertebra: A case report. *Spine (Phila Pa 1976)*, 34(6), E230–4. <https://doi.org/10.1097/BRS.0b013e31818f8f7c>
164. Massoud, M., Del Bufalo, F., Caterina Musolino, A. M., Schingo, P. M., Gaspari, S., Pisani, M., Orazi, C., Reale, A. & Raucci, U. (2016). Myeloid Sarcoma Presenting as Low Back Pain in the Pediatric Emergency Department. *J Emerg Med*, 51(3), 308–314. <https://doi.org/10.1016/j.jemermed.2016.01.033>
165. Mlczech, L., Attarbaschi, A., Dworzak, M., Gadner, H. & Mann, G. (2005). Alopecia areata and multifocal bone involvement in a young adult with Hodgkin's disease. *Leuk Lymphoma*, 46(4), 623–627. <https://doi.org/10.1080/10428190500032570>
166. Mora, J. & Wollner, N. (1999). Primary epidural non-Hodgkin lymphoma: Spinal cord compression syndrome as the initial form of presentation in childhood non-Hodgkin lymphoma. *Med Pediatr Oncol*, 32(2), 102–105.
167. Mukhopadhyay, P., Gairola, M., Sharma, M. C., Thulkar, S., Julka, P. K. & Rath, G. K. (2001). Primary spinal epidural extraosseous Ewing's sarcoma: Report of five cases and literature review. *Australasian Radiology*, 45(3), 372–379.
168. Muller, I., Vlach, O., Cienciala, J. & Chaloupka, R. (1999). Low back pain and osteoid osteoma of the spine in childhood. Case study. *Scripta Medica Facultatis Medicae Universitatis Brunensis Masarykianae*, 72(4), 131–135.
169. O'Brien, J., Ward, E., Doody, O. & Ryan, M. (2009). A case of back pain associated with neurology in a young man. *Ir J Med Sci*, 178(3), 373–375. <https://doi.org/10.1007/s11845-008-0170-y>
170. Oguro, K., Sakai, H., Arai, M. & Igarashi, T. (2013). Eosinophilic granuloma of bone: Two case reports. *Brain and Development*, 35(4), 372–375. <https://doi.org/10.1016/j.braindev.2012.06.007>
171. Oliveri, M. B., Mautalen, C. A., Rodriguez Fuchs, C. A. & Romanelli, M. C. (1991). Vertebral compression fractures at the onset of acute lymphoblastic leukemia in a child. *Henry Ford Hosp Med J*, 39(1), 45–48.
172. Omid-Kashani, F., Hasankhani, E. G. & Rafeemanesh, E. (2014). Sciatica in a five-year-old boy. *Asian Spine J*, 8(3), 357–360. <https://doi.org/10.4184/asj.2014.8.3.357>
173. Ono, T., Sakamoto, A., Jono, O. & Shimizu, A. (2018). Osteoid osteoma can occur at the pars interarticularis of the lumbar spine, leading to misdiagnosis of lumbar spondylolysis. *American Journal of Case Reports*, 19, 207–213. <https://doi.org/10.12659/AJCR.907438>
174. Pandya, N. A., Meller, S. T., MacVicar, D., Atra, A. A. & Pinkerton, C. R. (2001). Vertebral compression fractures in acute lymphoblastic leukaemia and remodelling after treatment. *Arch Dis Child*, 85(6), 492–493.

175. Patil, M., Pratinidhi, S. A., Malik, A., Gulati, R. & Joshi, A. R. (2012). Primary B cell Non-Hodgkin's lymphoma presenting with multiple osteolytic bony lesions in skull. *Journal of Clinical and Diagnostic Research*, 5(7), 1464–1466.
176. Rogalsky, R. J., Black, G. B. & Reed, M. H. (1986). Orthopaedic manifestations of leukemia in children. *J Bone Joint Surg Am*, 68(4), 494–501.
177. Rothschild, E. J., Savitz, M. H., Chang, T., Worcester, D. & Peck, H. M. (1984). Primary vertebral tumor in an adolescent girl. *Spine (Phila Pa 1976)*, 9(7), 695–701.
178. Salim, H., Ariawati, K., Suryawan, W. B. & Arimbawa, M. (2014). Osteoporosis resulting from acute lymphoblastic leukemia in a 7-year-old boy: A case report. *Journal of Medical Case Reports*, 8(1). <https://doi.org/10.1186/1752-1947-8-168>
179. Samadian, M., Vahidi, S., Khormae, F. & Ashraf, H. (2009). Isolated, Primary Spinal Epidural Hodgkin's Disease in a Child. *Pediatric Neurology*, 40(6), 480–482. <https://doi.org/10.1016/j.pediatrneurol.2009.01.006>
180. Samuda, G. M., Cheng, M. Y. & Yeung, C. Y. (1987). Back pain and vertebral compression: An uncommon presentation of childhood acute lymphoblastic leukemia. *Journal of Pediatric Orthopaedics*, 7(2), 175–178.
181. Santangelo, J. R. & Thomson, J. D. (1999). Childhood leukemia presenting with back pain and vertebral compression fractures. *Am J Orthop (Belle Mead NJ)*, 28(4), 257–260.
182. Sarangi, P. K., Mohanty, J., Parida, S., Swain, B. M. & Kumar, S. (2017). Aneurysmal bone cyst of C2 cervical spine presenting as an asymptomatic posterior neck swelling. *Journal of Clinical and Diagnostic Research*, 11(12), TD01-TD03. <https://doi.org/10.7860/JCDR/2017/32660.10990>
183. Schmitz, A., Diedrich, O. & Schmitt, O. (2000) [Sacral osteoid osteoma—a rare cause of back pain in childhood and adolescence]. *Klin Padiatr*, 212(3), 110–112. <https://doi.org/10.1055/s-2000-9662> (Erstveröffentlichung Osteoidosteom im Os sacrum—eine seltene Ursache des Rückenschmerzes beim Kind und Jugendlichen.)
184. Silveri, A., Gaudiano, J. & Lago, G. (2008). Osteoid osteoma: Nidus radioguided spine surgery. *Coluna/ Columna*, 7(1), 45–50.
185. Simonati, A., Vio, M., Iannucci, A. M., Bricolo, A. & Rizzuto, N. (1981). Lumbar epidural ewing sarcoma - Light and electron microscopic investigation. *Journal of Neurology*, 225(1), 67–72. <https://doi.org/10.1007/BF00313464>
186. Siribumrungwong, K., Tangtrakulwanich, B. & Nitruangjaras, A. (2013). Unusual presentation of giant cell tumor originating from a facet joint of the thoracic spine in a child: A case report and review of the literature. *J Med Case Rep*, 7, 178. <https://doi.org/10.1186/1752-1947-7-178>
187. Slavic, I., Urban, C., Kaulfersch, W. & Mutz, I. (1987). Changes in the vertebrae as an initial symptom of leukemia. *Padiatrie und Padologie*, 22(1), 59–65.
188. Smith, J. R. & Samdani, A. F. (2008). An unusual cause of low back pain in an adolescent. *Jaapa*, 21(10), 56–57.
189. Srinivasalu, S. & D'Souza, A. (2009). Sacral Ewing's Sarcoma and Challenges in it's Diagnosis on MRI. *J Radiol Case Rep*, 3(1), 23–26. <https://doi.org/10.3941/jrcr.v3i1.79>
190. Szudy, A., Litak, J., Zawitkowska, J. & Kowalczyk, J. (2012). Back pain as a first symptom of hematologic malignancy in a 9-year-old girl. *Pediatrics Polska*, 87(1), 95–98. [https://doi.org/10.1016/S0031-3939\(12\)70600-5](https://doi.org/10.1016/S0031-3939(12)70600-5)
191. Togral, G., Arikan, M., Hasturk, A. E. & Gungor, S. (2014). Painful scoliosis due to superposed giant cell bone tumor and aneurysmal bone cyst in a child. *J Pediatr Orthop B*, 23(4), 328–332. <https://doi.org/10.1097/bpb.0000000000000055>
192. van Cleve, L., Muñoz, C. E., Riggs, M. L., Bava, L. & Savedra, M. (2012). Pain Experience in Children With Advanced Cancer. *Journal of Pediatric Oncology Nursing*, 29(1), 28–36. <https://doi.org/10.1177/1043454211432295>
193. Vázquez-García, B., Barrios, C., Villas, C., San-Julian, M., Maruenda, J. I., Alfonso, M. & Burgos, J. (2012). Ewing's sarcoma of the spine with initial myeloradicular involvement in children and adolescents. *European Orthopaedics and Traumatology*, 3(3), 189–194. <https://doi.org/10.1007/s12570-012-0122-x>
194. Verzosa, m. S., Aur, R. J. A., Simone, J. V., Hustu, H. O. & Pinkel, D. P. (1976). Five years after central nervous system irradiation of children with leukemia. *International Journal of Radiation Oncology, Biology, Physics*, 1(3-4), 209–215. [https://doi.org/10.1016/0360-3016\(76\)90042-0](https://doi.org/10.1016/0360-3016(76)90042-0)
195. Virayavanich, W., Sirikulchayanonta, V., Jaovisidha, S., Hongeng, S., Laohacharoensombat, W. & Pornkul, R. (2010). Presacral fibrosarcoma in childhood: a case report. *J Med Assoc Thai*, 93(2), 252–256.
196. Wei, M. A. & RuiXue, M. A. (2006). Solitary spinal eosinophilic granuloma in children. *Journal of Pediatric Orthopaedics Part B*, 15(5), 316–319. <https://doi.org/10.1016/j.cplett.2006.04.066>
197. Wei, S. H., Sheen, J. M., Huang, C. B. & Hsiao, C. C. (2001). Primary spinal epidural non-Hodgkin's lymphoma in a child. *Chang Gung Med J*, 24(12), 820–825.
198. Wilson, P. E., Oleszek, J. L. & Clayton, G. H. (2007). Pediatric spinal cord tumors and masses. *Journal of Spinal Cord Medicine*, 30(SUPPL. 1), S15-S20.
199. Wong, M., Chung, C. H. & Ngai, W. K. (2002). Hip pain and childhood malignancy. *Hong Kong Med J*, 8(6), 461–463.
200. Yamamoto, T., Fujita, I., Kurosaka, M. & Mizuno, K. (2001). Sacral radiculopathy secondary to multicentric osteosarcoma. *Spine (Phila Pa 1976)*, 26(15), 1729–1732.
201. Yavuz, H. & Çakir, M. (2001). Transverse myelopathy: An initial presentation of acute leukemia. *Pediatric Neurology*, 24(5), 382–384. [https://doi.org/10.1016/S0887-8994\(01\)00258-2](https://doi.org/10.1016/S0887-8994(01)00258-2)
202. Zenonos, G., Jamil, O., Governale, L. S., Jernigan, S., Hedequist, D. & Proctor, M. R. (2012). Surgical treatment for primary spinal aneurysmal bone cysts: experience from Children's Hospital Boston. *J Neurosurg Pediatr*, 9(3), 305–315. <https://doi.org/10.3171/2011.12.peds11253>

### Neoplasms / tumours of spinal cord, spinal nerves or paraspinal ganglia

203. Bond, J. V. (1975). Abdominal pain caused by metastatic neuroblastoma. *Clin. Oncol.*, 1(2), 97–99.
204. Bourke, C. J., Lynch, S., Irving, H. & Borzi, P. A. (2002). Retroperitoneal paraganglioma in a child: Resection and vena caval reconstruction. *Pediatric Surgery International*, 18(5-6), 505–508. <https://doi.org/10.1007/s00383-002-0712-8>
205. Chen, F., Chiou, S. S., Lin, S. F., Lieu, A. S., Chen, Y. T. & Huang, C. J. (2017). Recurrent spinal primitive neuroectodermal tumor with brain and bone metastases: A case report. *Medicine (Baltimore)*, 96(46), e8658. <https://doi.org/10.1097/md.00000000000008658>
206. Cho, J. C. S., Miller, A. & Kettner, N. W. (2009). Cervical Ependymoma in a Male Adolescent With Neck and Back Pain. *Journal of Manipulative and Physiological Therapeutics*, 32(8), 695–700. <https://doi.org/10.1016/j.jmpt.2009.08.021>
207. Ekuma, E. M., Ito, K., Chiba, A., Hara, Y., Kanaya, K., Horiuchi, T., Ohaegbulam, S. & Hongo, K. (2017). A Rare Case of Pediatric Lumbar Spinal Ependymoma Mimicking Meningitis. *World Neurosurgery*, 100, 710.e1-710.e5. <https://doi.org/10.1016/j.wneu.2017.02.016>
208. Estey, A. & Lim, R. (2010). Sudden-onset back pain and cauda equina syndrome in an adolescent: A case report. *Pediatric Emergency Care*, 26(9), 672–675. <https://doi.org/10.1097/PEC.0b013e3181f054a9>
209. Garber, S. T., Bollo, R. J. & Riva-Cambrin, J. K. (2013). Pediatric spinal pilomyxoid astrocytoma: Case report. *Journal of Neurosurgery: Pediatrics*, 12(5), 511–516. <https://doi.org/10.3171/2013.8.PEDS1397>
210. Kabler, H. A., Syska, B. E., Springer, B. L. & Singer, J. I. (2008). Ependymoma as a cause of low back pain in a young healthy athlete. *Pediatr Emerg Care*, 24(10), 685–687. <https://doi.org/10.1097/PEC.0b013e3181887e60>
211. Karlowee, V., Kolakshyapati, M., Amatya, V. J., Takayasu, T., Nosaka, R., Sugiyama, K., Kurisu, K. & Yamasaki, F. (2017). Diffuse leptomeningeal glioneuronal tumor (DLGNT) mimicking Whipple's disease: a case report and literature review. *Child's Nervous System*, 33(8), 1411–1414. <https://doi.org/10.1007/s00381-017-3405-2>
212. Khalatbari, M. R., Hamidi, M., Moharamzad, Y. & Shobeiri, E. (2016). Primary multifocal myxopapillary ependymoma of the flum terminale. *Journal of Neurosurgical Sciences*, 60(4), 424–429.
213. Komotar, R. J., Carson, B. S., Rao, C., Chaffee, S., Goldthwaite, P. T. & Tihan, T. (2005). Pilomyxoid astrocytoma of the spinal cord: report of three cases. *Neurosurgery*, 56(1), 191. <https://doi.org/10.1227/01.neu.0000146212.95421.b3>
214. Kudo, H., Kokunai, T., Kuwamura, K., Tamaki, N., Sawa, H., Izawa, I., Tatsumi, S., Hamano, S. & Matsumoto, S. (1992). Treatment of early recurrent medulloblastoma in children with cisplatin and etoposide: a preliminary report. *Childs Nerv Syst*, 8(3), 133–135.
215. Lam, C. H. & Nagib, M. G. (2002). Nonteratomatous tumors in the pediatric sacral region. *Spine (Phila Pa 1976)*, 27(11), E284-7.
216. Lu, Y. C., Fan, H. C., Gao, H. W., Chen, C. M., Jen, Y. M., Cheng, S. N. & Chen, S. J. (2012). Effective radiotherapy cured cauda equina syndrome caused by remitted intracranial germinoma depositing. *Pediatr Neonatol*, 53(5), 315–319. <https://doi.org/10.1016/j.pedneo.2012.07.007>
217. Moon, J. H., Jung, T. Y., Jung, S. & Jang, W. Y. (2012). Leptomeningeal dissemination of a low-grade brainstem glioma without local recurrence. *Journal of Korean Neurosurgical Society*, 51(2), 109–112. <https://doi.org/10.3340/jkns.2012.51.2.109>
218. Moshfeghi, D. M., Wilson, M. W., Haik, B. G., Hill, D. A., Rodriguez-Galindo, C. & Pratt, C. B. (2002). Retinoblastoma metastatic to the ovary in a patient with Waardenburg syndrome. *Am J Ophthalmol*, 133(5), 716–718.
219. Nadkarni, T. D., Rekate, H. L. & Coons, S. W. (1999). Plexiform neurofibroma of the cauda equina: Case report. *Journal of Neurosurgery*, 91(1 SUPPL.), 112–115.
220. Nagib, M. G. & O'Fallon, M. T. (1997). Myxopapillary ependymoma of the conus medullaris and filum terminale in the pediatric age group. *Pediatr Neurosurg*, 26(1), 2–7.
221. Neinstein, L. S. (1989). Abdominal and flank pain as presenting symptoms of schwannoma. *Journal of Adolescent Health Care*, 10(2), 143–145. [https://doi.org/10.1016/0197-0070\(89\)90105-8](https://doi.org/10.1016/0197-0070(89)90105-8)
222. Nisenson, A. & Patterson, G. H. (1945). Spinal cord tumors in children: A study of three cases of ependymoma. *The Journal of Pediatrics*, 27(4), 315–323.
223. Oake, C., Borg, M. F., Hanieh, A. & Byard, R. W. (2006). Childhood glioblastoma multiforme of the spinal cord. *Australas Radiol*, 50(4), 360–363. <https://doi.org/10.1111/j.1440-1673.2006.01600.x>
224. O'Brien, M., Curtis, C., D'Hemecourt, P. & Proctor, M. (2009). A case of persistent back pain and constipation in a 5-year-old boy. *Physician and Sportsmedicine*, 37(1), 133–137. <https://doi.org/10.3810/PSM.2009.04.1694>
225. O'Halloran, P. J., Farrell, M., Caird, J., Capra, M. & O'Brien, D. (2013). Paediatric spinal glioblastoma: Case report and review of therapeutic strategies. *Child's Nervous System*, 29(3), 367–374. <https://doi.org/10.1007/s00381-013-2023-x>

226. Packer, R. J., Allen, J., Nielsen, S., Petito, C., Deck, M. & Jereb, B. (1983). Brainstem glioma: Clinical manifestations of meningeal gliomatosis. *Annals of Neurology*, 14(2), 177–182. <https://doi.org/10.1002/ana.410140204>
227. Park, D. H., Park, Y. K., Oh, J. I., Kwon, T. H., Chung, H. S., Cho, H. D. & Suh, Y. L. (2002). Oncocytic paraganglioma of the cauda equina in a child: Case report and review of the literature. *Pediatric Neurosurgery*, 36(5), 260–265. <https://doi.org/10.1159/000058430>
228. Patibandla, M. R., Kumar, A., Bhattacharjee, S., Sahu, B. P., Uppin, M. & Challa, S. (2012). Dual gliomas with syringomyelia in a child: Case report and literature review. *Pediatr Neurosurg*, 48(3), 168–173. <https://doi.org/10.1159/000346258>
229. Roushdi, A., Bassal, M. & Johnston, D. L. (2009). Delayed diagnosis in an adolescent with a malignant testicular tumour. *Paediatr Child Health*, 14(6), 393–394.
230. Shirasawa, H., Ishii, K., Iwanami, A., Mikami, S., Toyama, Y., Matsumoto, M. & Nakamura, M. (2014). Pediatric myxopapillary ependymoma treated with subtotal resection and radiation therapy: A case report and review of the literature. *Spinal Cord*, 52(SUPPL. 2), S18-S20. <https://doi.org/10.1038/sc.2014.95>
231. Sublett, J. M., Davenport, C., Eisenbrock, H., Dalal, S., Jaffar Kazmi, S. A. & Kershenovich, A. (2016). Pediatric Primary Diffuse Leptomeningeal Primitive Neuroectodermal Tumor: A Case Report and Literature Review. *Pediatr Neurosurg*. Epub ahead of print. <https://doi.org/10.1159/000452807>
232. Svenson, J. & Stephan Stapczynski, J. (1994). Childhood back pain: Diagnostic evaluation of an unusual case. *American Journal of Emergency Medicine*, 12(3), 334–336. [https://doi.org/10.1016/0735-6757\(94\)90153-8](https://doi.org/10.1016/0735-6757(94)90153-8)
233. Volejnikova, J., Bajciová, V., Sulovská, L., Geierová, M., Buriánková, E., Jarosová, M., Hajduch, M., Sterba, J. & Mihal, V. (2016). Bone marrow metastasis of malignant melanoma in childhood arising within a congenital melanocytic nevus. *Biomedical Papers*, 160(3), 456–460. <https://doi.org/10.5507/bp.2016.018>
234. Wiegel, T., Grzyska, U., Schwarz, R. & Escherich, G. (1995). Intraspinal metastasis in a patient with a stage I anaplastic Wilm's tumor. *Strahlentherapie und Onkologie*, 171(5), 296–299.
235. Wilne, S., Collier, J., Kennedy, C., Koller, K., Grundy, R. & Walker, D. (2007). Presentation of childhood CNS tumours: a systematic review and meta-analysis. *Lancet Oncology*, 8(8), 685–695. [https://doi.org/10.1016/S1470-2045\(07\)70207-3](https://doi.org/10.1016/S1470-2045(07)70207-3)
236. Wilson, P. E., Oleszek, J. L. & Clayton, G. H. (2007). Pediatric spinal cord tumors and masses. *Journal of Spinal Cord Medicine*, 30(SUPPL. 1), S15-S20.
237. Wong, M., Chung, C. H. & Ngai, W. K. (2002). Hip pain and childhood malignancy. *Hong Kong Med J*, 8(6), 461–463.
238. Wu, C. T., Tsay, P. K., Jaing, T. H., Chen, S. H., Tseng, C. K. & Jung, S. M. (2016). Oligodendrogliomas in Children: Clinical Experiences with 20 Patients. *Journal of Pediatric Hematology/Oncology*, 38(7), 555–558. <https://doi.org/10.1097/MPH.0000000000000610>
239. Yone, K., Ijiri, K., Hayashi, K., Yokouchi, M., Takenouchi, T., Manago, K., Nerome, Y., Ijichi, O., Ikarimoto, N. & Komiya, S. (2004). Primary malignant peripheral nerve sheath tumor of the cauda equina in a child case report. *Spinal Cord*, 42(3), 199–203. <https://doi.org/10.1038/sj.sc.3101567>

## Neoplasms / others

240. Aydoğan, A., Çorapçıoğlu, F., Levent Elemen, E., Gürbüz, Y., Tugay, M. & Öncel, S. (2009). A case report: Gastric adenocarcinoma in childhood. *Turkish Journal of Pediatrics*, 51(5), 489–492.
241. Bahrami, A., Dalton, J. D., Bangalore, S., Henry, C., Krane, J. F., Navid, F. & Ellison, D. W. (2012). Disseminated carcinoma ex pleomorphic adenoma in an adolescent confirmed by application of PLAG1 immunohistochemistry and FISH for PLAG1 rearrangement. *Head Neck Pathol*, 6(3), 377–383. <https://doi.org/10.1007/s12105-012-0330-2>
242. Braun, P., Serrano, F. M., Kazmi, K. & Alvarez-Garrijo, J. J. (2006). Large subpial lipoma of the dorsolumbar spinal cord in a pediatric patient. *European Journal of Radiology Extra*, 58(3), 63–67. <https://doi.org/10.1016/j.ejrex.2006.03.002>
243. Brown, J. M., Berkey, B. D. & Brooks, J. A. (2008). Discovery of a renal medullary carcinoma in an adolescent male with sickle cell trait by Tc-99m methylene diphosphonate bone scintigraphy. *Clin Nucl Med*, 33(12), 896–900. <https://doi.org/10.1097/RLU.0b013e31818bf31d>
244. Chaudhary, S. & Sah, J. P. (2017). Hypercalcemia due to nasopharyngeal carcinoma. *Journal of the Nepal Medical Association*, 56(205), 182–185.
245. Choi, S. H., Jeon, H. W., Oh, W. J. & Park, J. K. (2014). Bronchioloalveolar carcinoma in a juvenile rhabdomyosarcoma patient. *Korean Journal of Thoracic and Cardiovascular Surgery*, 47(1), 51–54. <https://doi.org/10.5090/kjtcs.2014.47.1.51>
246. Ded, K. S., Khurana, M. S., Narang, G. S., Gupta, A. K. & Kaur, L. (2012). GIST- A rare tumor in paediatric age group. *Online Journal of Health and Allied Sciences*, 11(1).
247. Diesen, D. L., Price, T. M. & Skinner, M. A. (2008). Uterine leiomyoma in a 14-year-old girl. *Eur J Pediatr Surg*, 18(1), 53–55. <https://doi.org/10.1055/s-2007-989299>
248. Fang, Y., Lu, J., Lin, J., Zhou, G., Li, Y., Chen, Z., Wei, J., Luo, J. & Chen, W. (2016). Impaired growth and development after sunitinib treatment in a child with locally progressive kidney cancer. *International Journal of Clinical and Experimental Medicine*, 9(2), 4943–4948.

249. Gelabert-Gonzalez, M., Agulleiro-Diaz, J. & Reyes-Santias, R. M. (2002). Spinal extradural angiolipoma, with a literature review. *Childs Nerv Syst*, 18(12), 725–728. <https://doi.org/10.1007/s00381-002-0653-5>
250. Gun, F., Erginel, B., Ünüvar, A., Kebudi, R., Salman, T. & Celik, A. (2012). Mediastinal masses in children: experience with 120 cases. *Pediatr Hematol Oncol*, 29(2), 141–147. <https://doi.org/10.3109/08880018.2011.646385>
251. Jha, B. & Choudhary, A. K. (2008). Unusual cause of back pain in an adolescent patient: A case report and natural history of aggressive vertebral hemangioma in children. *Pain Physician*, 11(5), 687–692.
252. Kano, K., Kuwashima, S., Kyo, K., Ito, S., Ando, T. & Ichimura, T. (1996). Steroid-induced epidural lipomatosis in nephrotic children: Early recognition with MR imaging. *Dokkyo Journal of Medical Sciences*, 23(4), 185–191.
253. Keenen, T. L., Buehler, K. C. & Campbell, J. R. (1995). Solitary lymphangioma of the spine. *Spine (Phila Pa 1976)*, 20(1), 102–105.
254. Khalatbari, M. R., Hamidi, M. & Moharamzad, Y. (2013). Acute presentation of solitary spinal epidural cavernous angioma in a child. *J Coll Physicians Surg Pak*, 23(5), 364–366.
255. Küpeli, S., Araç, A., Yalçın, B., Sökmensüer, C. & Büyükpamukçu, M. (2008). Lymphangiomatosis in a child: Eight years' follow-up without treatment. *Pediatric Hematology and Oncology*, 25(6), 614–619. <https://doi.org/10.1080/08880010802234879>
256. Maggiore, U. L. R., Ferrero, S., Bogliolo, S., Fulcheri, E., Musizzano, Y. & Menada, M. V. (2013). A case of large uterine myoma in a 14-year-old girl. *Journal of Gynecologic Surgery*, 29(2), 83–87. <https://doi.org/10.1089/gyn.2012.0097>
257. Möller, J., Girschick, H. J., Hahn, G. & Pessler, F. (2010). Steroid-induced spinal epidural lipomatosis in pediatric patients. *Zeitschrift für Rheumatologie*, 69(5), 447–449. <https://doi.org/10.1007/s00393-010-0608-2>
258. Möller, J. C., Cron, R. Q., Young, D. W., Girschick, H. J., Levy, D. M., Sherry, D. D., Kukita, A., Saijo, K. & Pessler, F. (2011). Corticosteroid-induced spinal epidural lipomatosis in the pediatric age group: report of a new case and updated analysis of the literature. *Pediatr Rheumatol Online J*, 9(1), 5. <https://doi.org/10.1186/1546-0096-9-5>
259. Pretell-Mazzini, J., Chikwava, K. R. & Dormans, J. P. (2012). Low back pain in a child associated with acute onset cauda equina syndrome: A rare presentation of an aggressive vertebral hemangioma: A case report. *Journal of Pediatric Orthopaedics*, 32(3), 271–276. <https://doi.org/10.1097/BPO.0b013e318247195a>
260. Rajah, G., To, C. Y., Sood, S., Ham, S., Altinok, D., Poulik, J. & Haridas, A. (2014). Epidural spinal cord compression in a patient with blue rubber bleb nevus syndrome. *J Neurosurg Pediatr*, 14(5), 486–489. <https://doi.org/10.3171/2014.8.peds13627>
261. Rocourt, D. V., Shiels, W. E., Hammond, S. & Besner, G. E. (2006). Contemporary management of benign hepatic adenoma using percutaneous radiofrequency ablation. *J Pediatr Surg*, 41(6), 1149–1152. <https://doi.org/10.1016/j.jpedsurg.2006.01.064>
262. Sekine, I., Izumi, N. & Hirao, J. (1978). Venous spinal angiomas in childhood. A case report. *Dokkyo Journal of Medical Sciences*, 5(2), 336–344.
263. Singh, P. K., Chandra, P. S., Vaghani, G., Savarkar, D. P., Garg, K., Kumar, R., Kale, S. S. & Sharma, B. S. (2016). Management of pediatric single-level vertebral hemangiomas presenting with myelopathy by three-pronged approach (ethanol embolization, laminectomy, and instrumentation): a single-institute experience. *Child's Nervous System*, 32(2), 307–314. <https://doi.org/10.1007/s00381-015-2941-x>
264. Skarupa, D. J., Ellison, E. C., Vitellas, K. M. & Frankel, W. L. (2004). Hepatocellular Adenomatosis is a Rare Entity that may Mimic Other Hepatocellular Lesions. *Annals of Diagnostic Pathology*, 8(1), 43–49. <https://doi.org/10.1016/j.anndiagpath.2003.11.010>
265. Uzunaslanoğlu, D., Saygin, C., Gungor, S., Hasiloglu, Z., Ozdemir, N. & Celkan, T. (2013). Novel use of propranolol for management of pain in children with vertebral hemangioma: Report of two cases. *Child's Nervous System*, 29(5), 855–860. <https://doi.org/10.1007/s00381-012-2012-5>
266. Vallabha, T., Ishwarappagol, V., Narasanagi, B., Sindgikar, V., Patil, V. & Potekar, R. M. (2017). Prepubertal bilateral giant fibroadenoma of breast with ulceration: A case report. *Journal of Krishna Institute of Medical Sciences University*, 6(4), 109–110.
267. Yilmaz, C. & Aydemir, F. (2018). Thoracic Intramedullary Lipoma in a 3-year-old Child: Spontaneous Decrease in the Size Following Incomplete Resection. *Asian J Neurosurg*, 13(1), 188–190. <https://doi.org/10.4103/1793-5482.180965>

### ***Congenital and acquired structural diseases of the spine***

268. Adib, N., Davies, K., Grahame, R., Woo, P. & Murray, K. J. (2005). Joint hypermobility syndrome in childhood. A not so benign multisystem disorder? *Rheumatology*, 44(6), 744–750. <https://doi.org/10.1093/rheumatology/keh557>
269. Ahemad, A., Dasgupta, B. & Jagiasi, J. (2008). Intervertebral disc calcification in a child. *Indian Journal of Orthopaedics*, 42(4), 480–481. <https://doi.org/10.4103/0019-5413.43401>

270. Al Kaissi, A., Ganger, R., Klaushofer, K., Rumpler, M. & Grill, F. (2008). Achondroplasia manifesting as enchondromatosis and ossification of the spinal ligaments: A case report. *Journal of Medical Case Reports*, 2. <https://doi.org/10.1186/1752-1947-2-263>
271. Assad, A. P., Abreu, A. S., Seguro, L. P., Guedes, L. K., Lima, F. R. & Pinto, A. L. (2014). Spondyloptosis in athlete. *Rev Bras Reumatol*, 54(3), 234–236.
272. Bac, A., Stagraczyński, Ł., Ciszek, E., Górkiewicz, M. & Szczygieł, A. (2009). Efficacy of Kinesiology Taping in the rehabilitation of children with low-angle scoliosis. *Fizjoterapia Polska*, 9(3), 202–210.
273. Basile Júnior, R., Barros Filho, T. E. de, Bonetti, C. L. & Rosemberg, L. A. (1992). Herniation of the lumbar disk in adolescents. *Revista Paulista de Medicina*, 110(2), 51–55.
274. Basu, P. S., Hilali Noordeen, M. H. & Elsebaie, H. (2001). Spondylolisthesis in osteogenesis imperfecta due to pedicle elongation: report of two cases. *Spine (Phila Pa 1976)*, 26(21), E506–9.
275. Benli, İ. T., Üzümcügil, O., Aydin, E., Ateş, B., Gürses, L. & Hekimoğlu, B. (2006). Magnetic resonance imaging abnormalities of neural axis in Lenke type 1 idiopathic scoliosis. *Spine*, 31(16), 1828–1833. <https://doi.org/10.1097/01.brs.0000227256.15525.9b>
276. Bettany-Saltikov, J., Weiss, H. R., Chockalingam, N., Kandasamy, G. & Arnell, T. (2016). A Comparison of Patient-Reported Outcome Measures Following Different Treatment Approaches for Adolescents with Severe Idiopathic Scoliosis: A Systematic Review. *Asian Spine J*, 10(6), 1170–1194. <https://doi.org/10.4184/asj.2016.10.6.1170>
277. Beutler, W. J., Fredrickson, B. E., Murtland, A., Sweeney, C. A., Grant, W. D. & Baker, D. (2003). The natural history of spondylolysis and spondylolisthesis: 45-Year follow-up evaluation. *Spine*, 28(10), 1027–1035. <https://doi.org/10.1097/00007632-200305150-00014>
278. Blatter, S. C., Min, K., Huber, H. & Ramseier, L. E. (2012). Spontaneous reduction of spondylolisthesis during growth: a case report. *J Pediatr Orthop B*, 21(2), 160–163. <https://doi.org/10.1097/BPB.0b013e328346727b>
279. Bradbury, N., Wilson, L. F. & Mulholland, R. C. (1996). Adolescent disc protrusions: A long-term follow-up of surgery compared to chymopapain. *Spine*, 21(3), 372–377. <https://doi.org/10.1097/00007632-199602010-00024>
280. Buttermann, G. R. & Mullin, W. J. (2008). Pain and disability correlated with disc degeneration via magnetic resonance imaging in scoliosis patients. *Eur Spine J*, 17(2), 240–249. <https://doi.org/10.1007/s00586-007-0530-8>
281. Carbó, E., Riquelme, Ó., García, A. & González, J. L. (2015). Vertebroplasty in a 10-year-old boy with Gorham–Stout syndrome. *Eur Spine J*, 24, 590–593. <https://doi.org/10.1007/s00586-015-3764-x>
282. Campbell, M., Dimar, J. R. 2., Glassman, S. D., Puno, R. M. & Johnson, J. R. (1995). Idiopathic juvenile osteoporosis. An unusual cause of back pain in an adolescent. *American journal of orthopedics (Belle Mead, N.J.)*, 24(11), 865–869.
283. Çelik, S., Göksu, K., Çelik, S. E. & Emir, C. B. (2011). Benign neurological recovery with low recurrence and low peridural fibrosis rate in pediatric disc herniations after lumbar microdiscectomy. *Pediatric Neurosurgery*, 47(6), 417–422. <https://doi.org/10.1159/000338982>
284. Choi, B. S., Hong, S. J., Chu, M. A., Lee, S. J., Lee, J. M., Bae, H. I. & Choe, B. H. (2014). Gastrointestinal tract involvement of Gorham's disease with expression of D2-40 in duodenum. *Pediatric Gastroenterology, Hepatology and Nutrition*, 17(1), 52–56. <https://doi.org/10.5223/pghn.2014.17.1.52>
285. Chromy, C. A., Carey, M. T., Balgaard, K. G. & Iaizzo, P. A. (2006). The Potential Use of Axial Spinal Unloading in the Treatment of Adolescent Idiopathic Scoliosis: A Case Series. *Archives of Physical Medicine and Rehabilitation*, 87(11), 1447–1453. <https://doi.org/10.1016/j.apmr.2006.08.325>
286. Clarke, N. M. & Cleak, D. K. (1983). Intervertebral lumbar disc prolapse in children and adolescents. *J Pediatr Orthop*, 3(2), 202–206.
287. Dang, L., Chen, Z., Liu, X., Guo, Z., Qi, Q., Li, W., Zeng, Y., Jiang, L., Wei, F., Sun, C. & Liu, Z. (2015). Lumbar Disk Herniation in Children and Adolescents: The Significance of Configurations of the Lumbar Spine. *Neurosurgery*, 77(6), 954–959. <https://doi.org/10.1227/NEU.0000000000000983>
288. De Lima, M. V., Duarte Júnior, A., Jorge, P. B., Bryk, F. F., Meves, R. & Avanzi, O. (2014). Frequency of spondylolysis and chronic low back pain in young soccer players. *Columa/Columna*, 13(2), 120–123. <https://doi.org/10.1590/S1808-18512014130200405>
289. Diab, M., Sharkey, M., Emans, J., Lenke, L., Oswald, T. & Sucato, D. (2010). Preoperative bracing affects postoperative outcome of posterior spine fusion with instrumentation for adolescent idiopathic scoliosis. *Spine*, 35(20), 1876–1879. <https://doi.org/10.1097/BRS.0b013e3181ef5c36>
290. Dimar, J. R. 2., Campbell, M., Glassman, S. D., Puno, R. M. & Johnson, J. R. (1995). Idiopathic juvenile osteoporosis. An unusual cause of back pain in an adolescent. *American journal of orthopedics (Belle Mead, N.J.)*, 24(11), 865–869
291. Donaldson, L. D. (2014). Spondylolysis in elite junior-level ice hockey players. *Sports Health*, 6(4), 356–359. <https://doi.org/10.1177/1941738113519958>
292. Dua, S. G. & Ali, A. (2016). Bone scintigraphy and CT findings in transverse process apophysitis. *Clinical Nuclear Medicine*, 41(7), 574–575. <https://doi.org/10.1097/RLU.0000000000001182>
293. Ebersold, M. J., Quast, L. M. & Bianco Jr, A. J. (1987). Results of lumbar discectomy in the pediatric patient. *Journal of Neurosurgery*, 67(5), 643–647.
294. El Rassi, G., Takemitsu, M., Glutting, J. & Shah, S. A. (2013). Effect of sports modification on clinical outcome in children and adolescent athletes with symptomatic lumbar spondylolysis. *Am J Phys Med Rehabil*, 92(12), 1070–1074. <https://doi.org/10.1097/PHM.0b013e318296da7e>

295. El Rassi, G., Takemitsu, M., Woratanarat, P. & Shah, S. A. (2005). Lumbar spondylolysis in pediatric and adolescent soccer players. *Am J Sports Med*, 33(11), 1688–1693. <https://doi.org/10.1177/0363546505275645>
296. Elgafy, H., Hart, R. C. & Tanius, M. (2015). Nonconsecutive Pars Interarticularis Defects. *Am J Orthop (Belle Mead NJ)*, 44(12), E526-9
297. Falcini, F., Trapani, S., Ermini, M. & Brandi, M. L. (1996). Intravenous administration of alendronate counteracts the in vivo effects of glucocorticoids on bone remodeling. *Calcif Tissue Int*, 58(3), 166–169.
298. Fisher, R. G. & Saunders, R. L. (1981). Lumbar disc protrusion in children. *Journal of Neurosurgery*, 54(4), 480–483.
299. Fortin, C., Grunstein, E., Labelle, H., Parent, S. & Ehrmann Feldman, D. (2016). Trunk imbalance in adolescent idiopathic scoliosis. *Spine J*, 16(6), 687–693. <https://doi.org/10.1016/j.spinee.2016.02.033>
300. Gelabert-González, M., Prieto-González, A., María Santin-Amo, J., Serramito-García, R. & García-Allut, A. (2009). Lumbar synovial cyst in an adolescent: Case report. *Child's Nervous System*, 25(6), 719–721. <https://doi.org/10.1007/s00381-009-0833-7>
301. Gelfand, M. J., Strife, J. L. & Kereiakes, J. G. (1981). Radionuclide bone imaging in spondylolysis of the lumbar spine in children. *Radiology*, 140(1), 191–195. <https://doi.org/10.1148/radiology.140.1.6454161>
302. Gemmel, F., Coningh, A. de, Collins, J. & Rijk, P. (2011). SPECT/CT of osteitis condensans ilii: one-stop shop imaging. *Clin Nucl Med*, 36(1), 59–61. <https://doi.org/10.1097/RLU.0b013e3181feefe8>
303. Gorsha, O. V., Aplevich, V. M. & Zukow, W. (2017). Efficiency of kinesiotaping application in the complex rehabilitation of children with idiopathic scoliosis. *Journal of Physical Education and Sport*, 17(3), 1154–1157. <https://doi.org/10.7752/jpes.2017.03177>
304. Greiner, A. K. (2002). Adolescent idiopathic scoliosis: radiologic decision-making. *American Family Physician*, 65(9), 1817
305. Grier, D., Wardell, S., Sarwark, J. & Poznanski, A. K. (1993). Fatigue fractures of the sacrum in children: two case reports and a review of the literature. *Skeletal Radiol*, 22(7), 515–518.
306. Grødahl, L. H. J., Fawcett, L., Nazareth, M., Smith, R., Spencer, S., Heneghan, N. & Rushton, A. (2016). Diagnostic utility of patient history and physical examination data to detect spondylolysis and spondylolisthesis in athletes with low back pain: A systematic review. *Manual Therapy*, 24, 7–17. <https://doi.org/10.1016/j.math.2016.03.011>
307. Grossman, D. C., Curry, S. J., Owens, D. K., Barry, M. J., Davidson, K. W., Doubeni, C. A., Epling, J. W., Kemper, A. R., Krist, A. H., Kurth, A. E., Landefeld, C. S., Mangione, C. M., Phipps, M. G., Silverstein, M., Simon, M. A. & Tseng, C. W. (2018). Screening for adolescent Idiopathic Scoliosis US preventive services task force recommendation statement. *JAMA - Journal of the American Medical Association*, 319(2), 165–172. <https://doi.org/10.1001/jama.2017.19342>
308. Haapanen, A., Latvala, A. & Ala-Ketola, L. (1985). Anterior intervertebral disc herniation in young athletes. *Scandinavian Journal of Sports Sciences*, 7(2), 41–44.
309. Haasbeek, J. F. & Green, N. E. (1994). Adolescent stress fractures of the sacrum: Two case Reports. *Journal of Pediatric Orthopaedics*, 14(3), 336–338.
310. Halperin, N., Copeliovitch, L. & Schachner, E. (1983). Radiating leg pain and positive straight leg raising in spondylolysis in children. *J Pediatr Orthop*, 3(4), 486–490
311. Helenius, I., Remes, V., Yrjönen, T., Ylikoski, M., Schlenzka, D., Helenius, M. & Poussa, M. (2005). Does gender affect outcome of surgery in adolescent idiopathic scoliosis? *Spine*, 30(4), 462–467. <https://doi.org/10.1097/01.brs.0000153347.11559.de>
312. Hession, E. F. & Donald, G. D. (1993). Treatment of multiple lumbar disk herniations in an adolescent athlete utilizing flexion distraction and rotational manipulation. *J Manipulative Physiol Ther*, 16(3), 185–192.
313. Hoashi, J. S., Thomas, S. M., Goodwin, R. C., Gurd, D. P., Hanna, R. & Kuivila, T. E. (2016). Balloon Kyphoplasty for Managing Intractable Pain in Pediatric Pathologic Vertebral Fractures. *J Pediatr Orthop*. Epub ahead of print. <https://doi.org/10.1097/bpo.0000000000000886>
314. Holcomb, R. R., Worthington, W. B., McCullough, B. A. & McLean, M. J. (2000). Static magnetic field therapy for pain in the abdomen and genitals. *Pediatric Neurology*, 23(3), 261–264. [https://doi.org/10.1016/S0887-8994\(00\)00180-6](https://doi.org/10.1016/S0887-8994(00)00180-6)
315. Hoo, J. J. & Oliphant, M. (2003). Two sibs with brachyolmia type Hobæk: Five year follow-up through puberty. *American Journal of Medical Genetics*, 116(1), 80–84
316. Hopkins, J., Sakai, T., Sairyo, K., Mefford, J., Bhatia, N. N., Tonogai, I., Dezawa, A. & Yasui, N. (2013). Endoscope-assisted excision of a juxtafacet cyst in an adolescent athlete: A case report. *Journal of Neurological Surgery, Part A: Central European Neurosurgery*, 74(SUPPL.1), e66-e69. <https://doi.org/10.1055/s-0032-1325635>
317. Ishihara, H., Matsui, H., Hirano, N. & Tsuji, H. (1997). Lumbar intervertebral disc herniation in children less than 16 years of age: Long-term follow-up study of surgically managed cases. *Spine*, 22(17), 2044–2049. <https://doi.org/10.1097/00007632-199709010-00022>
318. Ishikawa, S., Kumar, S. J. & Torres, B. C. (1994). Surgical treatment of dysplastic spondylolisthesis: Results after in situ fusion. *Spine*, 19(15), 1691–1696.
319. Jalanko, T., Helenius, I., Remes, V., Lamberg, T., Tervahartiala, P., Yrjönen, T., Poussa, M. & Schlenzka, D. (2011). Operative treatment of isthmic spondylolisthesis in children: A long-term, retrospective comparative study with matched cohorts. *European Spine Journal*, 20(5), 766–775. <https://doi.org/10.1007/s00586-010-1591-7>
320. Johnson, D. L., Faldi, S. & McLone, D. G. (1990). The diagnosis and treatment of pediatric lumbar spine injuries caused by rear seat lap belts. *Neurosurgery*, 26(3), 434–441.

321. Joncas, J., Labelle, H., Poitras, B., Duhaime, M., Rivard, C. H., Grimard, G. & Leblanc, R. (1997). Back pain in patients with adolescent idiopathic scoliosis(AIS). *Studies in Health Technology and Informatics*, 37, 381–384. <https://doi.org/10.3233/978-1-60750-881-6-381>
322. Kalevski, S. K., Haritonov, D. G. & Peev, N. A. (2014). Lumbar intraforaminal synovial cyst in young adulthood: case report and review of the literature. *Global Spine J*, 4(3), 191–196. <https://doi.org/10.1055/s-0034-1370694>
323. Kaloostian, P. E., Kim, J. E., Calabresi, P. A., Bydon, A. & Witham, T. (2013). Clay-shoveler's fracture during indoor rock climbing. *Orthopedics*, 36(3), e381-3. <https://doi.org/10.3928/01477447-20130222-31>
324. Karlsson, M. K., Moller, A., Hasserijs, R., Besjakov, J., Karlsson, C. & Ohlin, A. (2003). A modeling capacity of vertebral fractures exists during growth: an up-to-47-year follow-up. *Spine (Phila Pa 1976)*, 28(18), 2087–2092. <https://doi.org/10.1097/01.brs.0000084680.76654.b1>
325. Kemmochi, M., Sasaki, S. & Ichimura, S. (2018). Association between reduced trunk flexibility in children and lumbar stress fractures. *Journal of Orthopaedics*, 15(1), 122–127. <https://doi.org/10.1016/j.jor.2018.01.014>
326. Kim, J. H., Kim, S. W. & Kim, H. S. (2012). Congenital osseous bridging of lumbar transverse processes. *J Korean Neurosurg Soc*, 52(2), 159–160. <https://doi.org/10.3340/jkns.2012.52.2.159>
327. Kim, P., Kim, S. W., Ju, C. I. & Kim, H. S. (2015). Lumbar Disc Herniation Combined with Posterior Apophyseal Ring Separation in a Young Child: A Case Report. *Korean J Spine*, 12(3), 143–145. <https://doi.org/10.14245/kjs.2015.12.3.143>
328. Koehler, S. M., Rosario-Quinones, F., Mayer, J., McAnany, S., Schiller, A. L., Qureshi, S. & Hecht, A. C. (2014). Understanding acute apophyseal spinous process avulsion injuries. *Orthopedics*, 37(3), e317-21. <https://doi.org/10.3928/01477447-20140225-68>
329. Koptan, W. M. T., Elmiligui, Y. H. & Elsharkawi, M. M. (2011). Direct repair of spondylolysis presenting after correction of adolescent idiopathic scoliosis. *Spine Journal*, 11(2), 133–138. <https://doi.org/10.1016/j.spinee.2011.01.012>
330. Kozlowski, K. (1977). Anterior intervertebral disc herniations in children. Report of four cases. *Pediatr Radiol*, 6(1), 32–35.
331. Kozlowski, K. (1978). Anterior intervertebral disc herniations. (Report of six cases). *Fortschritte auf dem Gebiete der Röntgenstrahlen und der Nuklearmedizin*, 129(1), 47–49.
332. Kruppa, C. G., Khoriaty, J. D., Sietsema, D. L., Dudda, M., Schildhauer, T. A. & Jones, C. B. (2016). Pediatric pelvic ring injuries: How benign are they? *Injury*, 47(10), 2228–2234. <https://doi.org/10.1016/j.injury.2016.07.002>
333. Kuh, S. U., Kim, Y. S., Cho, Y. E., Yoon, Y. S., Jin, B. H., Kim, K. S. & Chin, D. K. (2005). Surgical treatments for lumbar disc disease in adolescent patients; chemonucleolysis/microsurgical discectomy/PLIF with cages. *Yonsei Medical Journal*, 46(1), 125–132.
334. Ladenhauf, H. N., Fabricant, P. D., Grossman, E., Widmann, R. F. & Green, D. W. (2013). Athletic participation in children with symptomatic spondylolysis in the New York Area. *Medicine and Science in Sports and Exercise*, 45(10), 1971–1974. <https://doi.org/10.1249/MSS.0b013e318294b4ed>
335. Lagerbäck, T., Elkan, P., Möller, H., Grauers, A., Diarbakerli, E. & Gerdhem, P. (2015). An observational study on the outcome after surgery for lumbar disc herniation in adolescents compared with adults based on the Swedish Spine Register. *Spine Journal*, 15(6), 1241–1247. <https://doi.org/10.1016/j.spinee.2015.02.024>
336. Landman, Z., Oswald, T., Sanders, J. & Diab, M. (2011). Prevalence and predictors of pain in surgical treatment of adolescent idiopathic scoliosis. *Spine (Phila Pa 1976)*, 36(10), 825–829. <https://doi.org/10.1097/BRS.0b013e3181de8c2b>
337. Large, D. F., Doig, W. G., Dickens, D. R., Torode, I. P. & Cole, W. G. (1991). Surgical treatment of double major scoliosis. Improvement of the lumbar curve after fusion of the thoracic curve. *Journal of Bone and Joint Surgery - Series B*, 73(1), 121–124
338. Lemire, J. J., Mierau, D. R., Crawford, C. M. & Dzus, A. K. (1996). Scheuermann's juvenile kyphosis. *Journal of Manipulative and Physiological Therapeutics*, 19(3), 195–201
339. Leroux, J., Vivier, P. H., Ould Slimane, M., Foulongne, E., Abu-Amara, S., Lechevallier, J. & Griffet, J. (2013). Early diagnosis of thoracolumbar spine fractures in children. A prospective study. *Orthopaedics and Traumatology: Surgery and Research*, 99(1), 60–65. <https://doi.org/10.1016/j.otsr.2012.10.009>
340. Lundin, D. A., Wiseman, D., Ellenbogen, R. G. & Shaffrey, C. I. (2003). Direct repair of the pars interarticularis for spondylolysis and spondylolisthesis. *Pediatr Neurosurg*, 39(4), 195–200
341. Makino, T., Kaito, T., Kashii, M., Iwasaki, M. & Yoshikawa, H. (2015). Low back pain and patient-reported QOL outcomes in patients with adolescent idiopathic scoliosis without corrective surgery. *SpringerPlus*, 4(1), 397. <https://doi.org/10.1186/s40064-015-1189-y>
342. Marhaug, G. (1993). Idiopathic juvenile osteoporosis. *Scand J Rheumatol*, 22(1), 45–47.
343. Martin, J., Brandser, E. A., Shin, M. J. & Buckwalter, J. A. (1995). Fatigue fracture of the sacrum in a child. *Canadian Association of Radiologists Journal*, 46(6), 468–470.
344. Martin, R. P., Deane, R. H. & Collett, V. (1997). Spondylolysis in children who have osteopetrosis. *J Bone Joint Surg Am*, 79(11), 1685–1689
345. McCall, I. W., Park, W. M., O'Brien, J. P. & Seal, V. (1985). Acute traumatic intraosseous disc herniation. *Spine (Phila Pa 1976)*, 10(2), 134–137.
346. Mehdian, S. M., Arun, R., Jones, A. & Cole, A. A. (2005). Reduction of severe adolescent isthmic spondylolisthesis: a new technique. *Spine (Phila Pa 1976)*, 30(19), E579-84.



347. Melchior, R., Zabel, B., Spranger, J. & Schumacher, R. (2005). Effective parenteral clodronate treatment of a child with severe juvenile idiopathic osteoporosis. *Eur J Pediatr*, 164(1), 22–27. <https://doi.org/10.1007/s00431-004-1541-7>
348. Merola, A. A., Haheer, T. R., Brkaric, M., Panagopoulos, G., Mathur, S., Kohani, O., Lowe, T. G., Lenke, L. G., Wenger, D. R., Newton, P. O., Clements Iii, D. H. & Betz, R. R. (2002). A multicenter study of the outcomes of the surgical treatment of adolescent idiopathic scoliosis using the Scoliosis Research Society (SRS) outcome instrument. *Spine*, 27(18), 2046–2051. <https://doi.org/10.1097/00007632-200209150-00015>
349. Micheli, L. J. & Wood, R. (1995). Back pain in young athletes. Significant differences from adults in causes and patterns. *Arch Pediatr Adolesc Med*, 149(1), 15–18
350. Miyagi, R., Sairyo, K., Sakai, T., Tezuka, F., Kitagawa, Y. & Dezawa, A. (2014). Persistent tight hamstrings following conservative treatment for apophyseal ring fracture in adolescent athletes: Critical appraisal. *Journal of Medical Investigation*, 61(3-4), 446–451. <https://doi.org/10.2152/jmi.61.446>
351. Miyakoshi, N., Kobayashi, A., Hongo, M. & Shimada, Y. (2015). Sacral rib: an uncommon congenital anomaly. *Spine J*, 15(6), e35-8. <https://doi.org/10.1016/j.spinee.2013.08.055>
352. Molina, V., Court, C., Dagher, G., Pourjamasb, B. & Nordin, J. Y. (2004). Fracture of the posterior margin of the lumbar spine: case report after an acute, unique, and severe trauma. *Spine (Phila Pa 1976)*, 29(24), E565-7.
353. Moller, A., Hasselius, R., Besjakov, J., Ohlin, A. & Karlsson, M. (2006). Vertebral fractures in late adolescence: A 27 to 47-year follow-up. *European Spine Journal*, 15(8), 1247–1254. <https://doi.org/10.1007/s00586-005-0043-2>
354. Mounasamy, V., Myers, B. & Phillips, J. H. (2006). Ganglion cyst of a lumbar facet joint in an adolescent - A case report. *European Journal of Orthopaedic Surgery and Traumatology*, 16(3), 231–233. <https://doi.org/10.1007/s00590-005-0063-y>
355. Negrini, S., Minozzi, S., Bettany-Saltikov, J., Chockalingam, N., Grivas, T. B., Kotwicki, T., Maruyama, T., Romano, M. & Zaina, F. (2015). Braces for idiopathic scoliosis in adolescents. *Cochrane Database of Systematic Reviews*(6)
356. Obukhov, S. K., Hankenson, L., Manka, M. & Maw, J. R. (1996). Multilevel lumbar disc herniation in 12-year-old twins. *Child's Nervous System*, 12(3), 169–171. <https://doi.org/10.1007/BF00266823>
357. Ozgen, S., Konya, D., Toktas, O. Z., Dagcinar, A. & Ozek, M. M. (2007). Lumbar disc herniation in adolescence. *Pediatr Neurosurg*, 43(2), 77–81. <https://doi.org/10.1159/000098377>
358. Parisini, P., Di Silvestre, M., Gregg, T., Miglietta, A. & Paderni, S. (2001). Lumbar disc excision in children and adolescents. *Spine (Phila Pa 1976)*, 26(18), 1997–2000.
359. Peh, W. C. G., Griffith, J. F., Yip, D. K. H. & Leong, J. C. Y. (1998). Magnetic resonance imaging of lumbar vertebral apophyseal ring fractures. *Australasian Radiology*, 42(1), 34–37.
360. Pinto, F. C., Poetscher, A. W., Quinhones, F. R., Pena, M. & Taricco, M. A. (2002). Lumbar disc herniation associated with scoliosis in a 15-year-old girl: case report. *Arq Neuropsiquiatr*, 60(2-a), 295–298.
361. Piper, S. & Degrauw, C. (2012). A 14-year-old competitive, high-level athlete with unilateral low back pain: case report. *J Can Chiropr Assoc*, 56(4), 283–291.
362. Polly, D. W., Jr. & Mason, D. E. (1991). Congenital absence of a lumbar pedicle presenting as back pain in children. *Journal of Pediatric Orthopaedics*, 11(2), 214–219.
363. Popko, J., Konstantynowicz, J., Kossakowski, D., Kaczmarski, M. & Piotrowska-Jastrzebska, J. (1997). Assessment of bone density in children with Scheuermann's disease. *Rocz Akad Med Bialymst*, 42(1), 245–250
364. Posch, E., Schwarz, N., Fischmeister, F. M., Mayr, J. & Schwarz, A. F. (1998). Unstable pelvic ring fractures. *Acta Chirurgica Austriaca*, 30(SUPPL. 143), 52–54.
365. Quinlan, E., Reinke, T. & Bogar, W. C. (2013). Spinous process apophysitis: a cause of low back pain following repetitive hyperextension in an adolescent female dancer. *J Dance Med Sci*, 17(4), 170–174.
366. Ralston, S. & Weir, M. (1998). Suspecting lumbar spondylolysis in adolescent low back pain. *Clin Pediatr (Phila)*, 37(5), 287–293.
367. Ramirez, N., Johnston, C. E. & Browne, R. H. (1997). The prevalence of back pain in children who have idiopathic scoliosis. *J Bone Joint Surg Am*, 79(3), 364–368.
368. Raudenbush, B. L., Chambers, R. C., Silverstein, M. P. & Goodwin, R. C. (2017). Indirect pars repair for pediatric isthmic spondylolysis: a case series. *J Spine Surg*, 3(3), 387–391. <https://doi.org/10.21037/jss.2017.08.08>
369. Read, M. T. (1994). Single photon emission computed tomography (SPECT) scanning for adolescent back pain. A sine qua non? *Br J Sports Med*, 28(1), 56–57
370. Rodd, C., Lang, B., Ramsay, T., Alos, N., Huber, A. M., Cabral, D. A., Scuccimarri, R., Miettinen, P. M., Roth, J., Atkinson, S. A., Couch, R., Cummings, E. A., Dent, P. B., Ellsworth, J., Hay, J., Houghton, K., Jurencak, R., Larché, M., LeBlanc, C., . . . Ward, L. M. (2012). Incident vertebral fractures among children with rheumatic disorders 12 months after glucocorticoid initiation: A national observational study. *Arthritis Care and Research*, 64(1), 122–131. <https://doi.org/10.1002/acr.20589>
371. Rodríguez, B. M., Sánchez, R. F., Abellán, E. D., Parra, J. Z., Canovas, C. S. & Sánchez, M. I. C. (2015). Bertolotti syndrome: A little known cause of low-back pain in childhood. *Journal of Pediatrics*, 166(1), 202–202.e1. <https://doi.org/10.1016/j.jpeds.2014.08.036>
372. Rysavy, M., Khayarin, M. A. & Arun, K. (2003). Sacroiliac joint dislocation in 11 years old boy treated by open reduction and internal fixation. *Acta Chir Orthop Traumatol Cech*, 70(2), 112–115.

373. Sakai, T., Goda, Y., Tezuka, F., Takata, Y., Higashino, K., Sato, M., Mase, Y., Nagamachi, A. & Sairyo, K. (2016). Characteristics of lumbar spondylolysis in elementary school age children. *Eur Spine J*, 25(2), 602–606. <https://doi.org/10.1007/s00586-015-4029-4>
374. Sato, T., Hirano, T., Ito, T., Morita, O., Kikuchi, R., Endo, N. & Tanabe, N. (2011). Back pain in adolescents with idiopathic scoliosis: Epidemiological study for 43,630 pupils in Niigata City, Japan. *European Spine Journal*, 20(2), 274–279. <https://doi.org/10.1007/s00586-010-1657-6>
375. Sattar, T., Bannister, C. M. & Turnbull, L. W. (1997). Long term outcome of 83 patients with occult spinal dysraphism. *European Journal of Pediatric Surgery, Supplement*, 7(1), 40
376. Sbrocchi, A. M., Rauch, F., Matzinger, M., Feber, J. & Ward, L. M. (2011). Vertebral fractures despite normal spine bone mineral density in a boy with nephrotic syndrome. *Pediatr Nephrol*, 26(1), 139–142. <https://doi.org/10.1007/s00467-010-1652-5>
377. Schwarz, N., Mayr, J., Fischmeister, F. M., Schwarz, A. F., Posch, E. & Ohner, T. (1994) [2 years results of conservative therapy of unstable fractures of the pelvic ring in children]. *Unfallchirurg*, 97(9), 439–444. (Erstveröffentlichung 2-Jahres-Ergebnisse der konservativen Therapie instabiler Beckenringfrakturen bei Kindern.)
378. Schwarz, N., Posch, E., Mayr, J., Fischmeister, F. M., Schwarz, A. F. & Ohner, T. (1998). Long-term results of unstable pelvic ring fractures in children. *Injury*, 29(6), 431–433.
379. Selhorst, M., Fischer, A., Graft, K., Ravindran, R., Peters, E., Rodenberg, R. & MacDonald, J. (2016). Long-Term Clinical Outcomes and Factors That Predict Poor Prognosis in Athletes After a Diagnosis of Acute Spondylolysis: A Retrospective Review With Telephone Follow-up. *J Orthop Sports Phys Ther*, 46(12), 1029–1036. <https://doi.org/10.2519/jospt.2016.7028>
380. Selhorst, M., Fischer, A. & MacDonald, J. (2019). Prevalence of spondylolysis in symptomatic adolescent athletes: an assessment of sport risk in nonelite athletes. *Clin J Sport Med*, 29(5), 421–425
381. Semeao, E. J., Stallings, V. A., Peck, S. N. & Piccoli, D. A. (1997). Vertebral compression fractures in pediatric patients with Crohn's disease. *Gastroenterology*, 112(5), 1710–1713.
382. Siebens, A. A., Hungerford, D. S. & Kirby, N. A. (1987). Achondroplasia: Effectiveness of an orthosis in reducing deformity of the spine. *Archives of Physical Medicine and Rehabilitation*, 68(6), 384–388
383. Smith, R. (1980). Idiopathic osteoporosis in the young. *Journal of Bone and Joint Surgery - Series B*, 62(4), 417–427.
384. Smith, R. (1995). Idiopathic juvenile osteoporosis: Experience of twenty-one patients. *Rheumatology*, 34(1), 68–77. <https://doi.org/10.1093/rheumatology/34.1.68>
385. Smorgick, Y., Floman, Y., Millgram, M. A., Anekstein, Y., Pekarsky, I. & Mirovsky, Y. (2006). Mid- to long-term outcome of disc excision in adolescent disc herniation. *Spine Journal*, 6(4), 380–384. <https://doi.org/10.1016/j.spinee.2005.10.015>
386. Soliman, H. M. (2016). Irrigation endoscopic assisted percutaneous pars repair: Technical note. *Spine J*, 16(10), 1276–1281. <https://doi.org/10.1016/j.spinee.2016.06.009>
387. Solomou, A., Kraniotis, P., Rigopoulou, A. & Petsas, T. (2018). Frequent Benign, Nontraumatic, Noninflammatory Causes of Low Back Pain in Adolescents: MRI Findings. *Radiol Res Pract*, 2018, 7638505. <https://doi.org/10.1155/2018/7638505>
388. Sousa, T., Skaggs, D. L., Chan, P., Yamaguchi, K. T., Jr., Borgella, J., Lee, C., Sawyer, J., Moisan, A., Flynn, J. M., Gunderson, M., Hresko, M. T., D'Hemecourt, P. & Andras, L. M. (2017). Benign Natural History of Spondylolysis in Adolescence With Midterm Follow-Up. *Spine Deformity*, 5(2), 134–138. <https://doi.org/10.1016/j.jspd.2016.10.005>
389. Spapens, N., Wouters, C. & Moens, P. (2010). Thoracolumbar intervertebral disc calcifications in an 8-year-old boy: Case report and review of the literature. *European Journal of Pediatrics*, 169(5), 577–580. <https://doi.org/10.1007/s00431-009-1076-z>
390. Stäbler, A., Paulus, R., Steinborn, M., Bosch, R., Matzko, M. & Reiser, M. (2000) [Spondylolysis in the developmental stage diagnostic contribution of MRI]. *Röfo*, 172(1), 33–37. <https://doi.org/10.1055/s-2000-278> (Erstveröffentlichung Die Spondylolyse im Stadium der Entstehung: Diagnostischer Beitrag der MRT)
391. Subasi, M., Arslan, H., Necmioglu, S., Onen, A., Ozen, S. & Kaya, M. (2004). Long-term outcomes of conservatively treated paediatric pelvic fractures. *Injury*, 35(8), 771–781. <https://doi.org/10.1016/j.injury.2003.09.037>
392. Sumita, T., Sairyo, K., Shibuya, I., Kitahama, Y., Kanamori, Y., Matsumoto, H., Koga, S., Kitagawa, Y. & Dezawa, A. (2013). V-Rod technique for direct repair surgery of pediatric lumbar spondylolysis combined with posterior apophyseal ring fracture. *Asian Spine Journal*, 7(2), 115–118. <https://doi.org/10.4184/asj.2013.7.2.115>
393. Sutton, T. J. & Turcotte, B. (1973). Posterior herniation of calcified intervertebral discs in children. *Canadian Association of Radiologists Journal*, 24(2), 131–136.
394. Swierkosz, S. & Nowak, Z. (2015). Low back pain in adolescents. An assessment of the quality of life in terms of qualitative and quantitative pain variables. *J Back Musculoskeletal Rehabil*, 28(1), 25–34. <https://doi.org/10.3233/bmr-140484>
395. Swischuk, L. E. & Stansberry, S. D. (1991). Calcific discitis: MRI changes in discs without visible calcification. *Pediatric Radiology*, 21(5), 365–366. <https://doi.org/10.1007/BF02011490>
396. Takahashi, Y., Kobayashi, T., Miyakoshi, N., Abe, E., Abe, T., Kikuchi, K. & Shimada, Y. (2016). Sacral stress fracture in an amateur rugby player: a case report. *J Med Case Rep*, 10(1), 327. <https://doi.org/10.1186/s13256-016-1120-3>
397. Tamaki, S., Yamashita, K., Higashino, K., Sakai, T., Takata, Y. & Sairyo, K. (2016). Lumbar Posterior Apophyseal Ring Fracture Combined with Spondylolysis in Pediatric Athletes: A Report of Three Cases. *JBJS Case Connector*, 6(3), e64. <https://doi.org/10.2106/JBJS.CC.15.00245>
398. Tan, L. O., Lim, S. Y. & Vasanwala, R. F. (2017). Primary osteoporosis in children. *BMJ Case Rep*, 2017. <https://doi.org/10.1136/bcr-2017-220700>

399. Taylor, G. A. & Eggli, K. D. (1988). Lap-belt injuries of the lumbar spine in children: a pitfall in CT diagnosis. *AJR Am J Roentgenol*, 150(6), 1355–1358. <https://doi.org/10.2214/ajr.150.6.1355>
400. Théroux, J., May, S. L., Fortin, C. & Labelle, H. (2015). Prevalence and management of back pain in adolescent idiopathic scoliosis patients: A retrospective study. *Pain Research and Management*, 20(3), 153–157.
401. Théroux, J., Stomski, N., Hodgetts, C. J., Ballard, A., Khadra, C., Le May, S. & Labelle, H. (2017). Prevalence of low back pain in adolescents with idiopathic scoliosis: A systematic review. *Chiropractic and Manual Therapies*, 25(1). <https://doi.org/10.1186/s12998-017-0143-1>
402. Toto, B. & Shapiro, I. (1995). Diagnosis and treatment of spondylolysis in an adolescent athlete. *Chiropractic Sports Medicine*, 9(3), 100–105
403. Ueda, Y., Kawahara, N., Murakami, H., Demura, S. & Tsuchiya, H. (2012). Thoracic disk herniation with paraparesis treated with transthoracic microdisectomy in a 14-year-old girl. *Orthopedics*, 35(5), e774-7. <https://doi.org/10.3928/01477447-20120426-41>
404. van Buskirk, C. S. & Ritterbusch, J. F. (1997). Natural history of distal spinal agenesis. *J Pediatr Orthop B*, 6(2), 146–152
405. Vrable, A. & Sherman, A. L. (2009). Elite male adolescent gymnast who achieved union of a persistent bilateral pars defect. *Am J Phys Med Rehabil*, 88(2), 156–160. <https://doi.org/10.1097/PHM.0b013e31819515c0>
406. Wang, H., Cheng, J., Xiao, H., Li, C. & Zhou, Y. (2013). Adolescent lumbar disc herniation: Experience from a large minimally invasive treatment centre for lumbar degenerative disease in Chongqing, China. *Clinical Neurology and Neurosurgery*, 115(8), 1415–1419. <https://doi.org/10.1016/j.clineuro.2013.01.019>
407. Wasowska-Krolikowska, K. & Krogulska, A. (1998). Idiopathic juvenile osteoporosis - Observation in the course of several years. *Medical Science Monitor*, 4(6), 1075–1079.
408. Weir, M. R. & Smith, D. S. (1989). Stress reaction of the pars interarticularis leading to spondylolysis. A cause of adolescent low back pain. *J Adolesc Health Care*, 10(6), 573–577.
409. Wessely, M. A., Mick, T. J. & Brandt, J. (2010). Low back pain in an adolescent American Footballer: Case discussion. *Clinical Chiropractic*, 13(1), 135–140. <https://doi.org/10.1016/j.clch.2010.02.013>
410. Wilson, F. D. & Lindseth, R. E. (1982). The adolescent "swimmer's back". *Am J Sports Med*, 10(3), 174–176
411. Yen, C. H., Chan, S. K., Ho, Y. F. & Mak, K. H. (2009). Posterior lumbar apophyseal ring fractures in adolescents: a report of four cases. *J Orthop Surg (Hong Kong)*, 17(1), 85–89.
412. Zamani, M. H. & MacEwen, G. D. (1982). Herniation of the lumbar disc in children and adolescents. *J Pediatr Orthop*, 2(5), 528–533.
413. Zapata, K. A., Wang-Price, S. S., Sucato, D. J., Thompson, M., Trudelle-Jackson, E. & Lovelace-Chandler, V. (2015). Spinal Stabilization Exercise Effectiveness for Low Back Pain in Adolescent Idiopathic Scoliosis: A Randomized Trial. *Pediatric Physical Therapy*, 27(4), 396–402. <https://doi.org/10.1097/PEP.0000000000000174>
414. Zhang, W., Kaplan, S. L., Servaes, S. & Zhuang, H. (2015). Limbus Vertebra on Bone Scintigraphy in a Pediatric Patient. *Clin Nucl Med*, 40(11), 915–916. <https://doi.org/10.1097/rlu.0000000000000970>

### Neurological and neuromuscular diseases

415. Adams, C. & Armstrong, D. (1990). Acute Transverse Myelopathy in Children. *Canadian Journal of Neurological Sciences / Journal Canadien des Sciences Neurologiques*, 17(1), 40–45. <https://doi.org/10.1017/S0317167100030006>
416. Azumagawa, K., Yamamoto, S., Tanaka, K., Sakanaka, H., Teraura, H., Takahashi, K. & Tamai, H. (2012). Non-operative treated spontaneous spinal epidural hematoma in a 12-year-old boy. *Pediatric Emergency Care*, 28(2), 167–169. <https://doi.org/10.1097/PEC.0b013e318244785d>
417. Begeer, J. H., Meihuizen de Regt, M. J., HogenEsch, L., Ter Weeme, C. A., Mooij, J. J. & Vencken, L. M. (1986). Progressive neurological deficit in children with spina bifida aperta. *Z Kinderchir*, 41 Suppl 1, 13–15. <https://doi.org/10.1055/s-2008-1043387>
418. Bond, A. E., Zada, G., Bowen, I., McComb, J. G. & Krieger, M. D. (2012). Spinal arachnoid cysts in the pediatric population: report of 31 cases and a review of the literature. *J Neurosurg Pediatr*, 9(4), 432–441. <https://doi.org/10.3171/2012.1.peds11391>
419. Chen, A. M., Neustadt, J. B. & Kucera, J. N. (2017). Rib head dislocation causing spinal canal stenosis in a child with neurofibromatosis, type 1. *J Radiol Case Rep*, 11(8), 8–15. <https://doi.org/10.3941/jrcr.v11i8.3113>
420. Colak, A., Pollack, I. F. & Albright, A. L. (1998). Recurrent tethering: A common long-term problem after lipomyelomeningocele repair. *Pediatric Neurosurgery*, 29(4), 184–190. <https://doi.org/10.1159/000028719>
421. Davis, G. A. & Klug, G. L. (2000). Acute-onset nontraumatic paraplegia in childhood: Fibrocartilaginous embolism or acute myelitis? *Child's Nervous System*, 16(9), 551–554.
422. Dillen, W. L., Hendricks, B. K., Mannas, J. P. & Wheeler, G. R. (2018). Surfer's myelopathy: A rare presentation in a teenage gymnast and review of the literature. *J Clin Neurosci*, 50, 157–160. <https://doi.org/10.1016/j.jocn.2018.01.039>

423. Doralp, S. & Bartlett, D. J. (2010). The prevalence, distribution, and effect of pain among adolescents with cerebral palsy. *Pediatric Physical Therapy*, 22(1), 26–33. <https://doi.org/10.1097/PEP.0b013e3181ccbab>
424. Dunne, K., Hopkins, I. J. & Shield, L. K. (1986). ACUTE TRANSVERSE MYELOPATHY IN CHILDHOOD. *Developmental Medicine & Child Neurology*, 28(2), 198–204. <https://doi.org/10.1111/j.1469-8749.1986.tb03855.x>
425. Dure, L. S., Percy, A. K., Cheek, W. R. & Laurent, J. P. (1989). Chiari type I malformation in children. *J Pediatr*, 115(4), 573–576.
426. Eid, R., Raj, A., Farber, D., Puri, V. & Bertolone, S. (2016). Spinal cord infarction in hemoglobin SC disease as an amusement park accident. *Pediatrics*, 138(3). <https://doi.org/10.1542/peds.2015-4020>
427. Evangelou, P., Meixensberger, J., Bernhard, M., Hirsch, W., Kiess, W., Merkenschlager, A., Nestler, U. & Preuss, M. (2013). Operative management of idiopathic spinal intradural arachnoid cysts in children: A systematic review. *Child's Nervous System*, 29(4), 657–664. <https://doi.org/10.1007/s00381-012-1990-7>
428. Foreman, P., Safavi-A Basi, S., Talley, M. C., Boeckman, L. & Mapstone, T. B. (2012). Perioperative outcomes and complications associated with allogeneic duraplasty for the management of Chiari malformations Type i in 48 pediatric patients: Clinical article. *Journal of Neurosurgery: Pediatrics*, 10(2), 142–149. <https://doi.org/10.3171/2012.5.PEDS11406>
429. Gennari, J. M., Themar-Noel, C., Paniel, M., Bensamoun, B., Deslandre, C., Linglart, A., Sokolowski, M. & Ferrari, A. (2015). Adolescent spinal pain: The pediatric orthopedist's point of view. *Orthopaedics and Traumatology: Surgery and Research*, 101(6), S247–S250. <https://doi.org/10.1016/j.otsr.2015.06.012>
430. Geyik, M., Alptekin, M., Erkuclu, I., Geyik, S., Erbas, C., Pusat, S. & Kural, C. (2015). Tethered cord syndrome in children: a single-center experience with 162 patients. *Childs Nerv Syst*, 31(9), 1559–1563. <https://doi.org/10.1007/s00381-015-2748-9>
431. Hoffman, H. J., Hendrick, E. B. & Humphreys, R. P. (1976). The tethered spinal cord: Its protean manifestations, diagnosis and surgical correction. *Pediatric Neurosurgery*, 2(3), 145–155. <https://doi.org/10.1159/000119610>
432. Hsu, P. C. & Chen, S. J. (2017). Longitudinal extensive transverse myelitis with an abnormal uFLC ratio in a pediatric patient: Case report and literature review. *Medicine (Baltimore)*, 96(52), e9389. <https://doi.org/10.1097/md.0000000000009389>
433. Joseph, R. N., Batty, R., Raghavan, A., Sinha, S., Griffiths, P. D. & Connolly, D. J. A. (2013). Management of isolated syringomyelia in the paediatric population-a review of imaging and follow-up in a single centre. *British Journal of Neurosurgery*, 27(5), 683–686. <https://doi.org/10.3109/02688697.2013.771728>
434. Kawecki, Z., Fafara, A., Kwiatkowski, S., Maryńczak, L., Milczarek, O., Kwiatkowski, T., Herman-Sucharska, I. & Wojtak, J. (2011). Tethered cord syndrome in children. *Journal of Orthopaedics Trauma Surgery and Related Research*(21), 39–48.
435. Komarowska, M., Debek, W., Wojnar, J. A., Hermanowicz, A. & Rogalski, M. (2013). Brown-Séquard syndrome in a 11-year-old girl due to penetrating glass injury to the thoracic spine. *European Journal of Orthopaedic Surgery and Traumatology*, 23(SUPPL. 2), S141–S143. <https://doi.org/10.1007/s00590-012-1050-8>
436. Kulwin, C. G., Patel, N. B., Ackerman, L. L., Smith, J. L., Boaz, J. C. & Fulkerson, D. H. (2013). Radiographic and clinical outcome of syringomyelia in patients treated for tethered cord syndrome without other significant imaging abnormalities. *Journal of Neurosurgery: Pediatrics*, 11(3), 307–312. <https://doi.org/10.3171/2012.11.PEDS12251>
437. Lannum, S. & Stratton, J. (2009). Spontaneous epidural hematoma of the thoracic spine in a 17-year-old adolescent boy: a case report. *Am J Emerg Med*, 27(5), 628.e5-6. <https://doi.org/10.1016/j.ajem.2008.08.031>
438. Lee, K. S. (1996). Delayed central cord syndrome after a handstand in a child: Case report. *Spinal Cord*, 34(3), 176–178.
439. Li, P. H., Chang, H. S., Huang, H. Y. & Lin, J. S. (2000). Guillain-Barre syndrome presenting with severe pain: Report of one case. *Acta Paediatrica Taiwanica*, 41(1), 33–35.
440. Lohani, S., Robertson, R. L. & Proctor, M. R. (2013). Ruptured temporal lobe arachnoid cyst presenting with severe back pain. *J Neurosurg Pediatr*, 12(3), 281–283. <https://doi.org/10.3171/2013.6.peds13122>
441. Lundkvist, K., Cson Silander, H., Dahl, M. & Stromberg, B. (1997). Tethered cord release: A 10 year retrospective study. *European Journal of Pediatric Surgery, Supplement*, 7(1), 11.
442. Martin-Fuentes, A. M., Pretell-Mazzini, J., Curto de la Mano, A. & Vina-Fernandez, R. (2013). High-grade spondylometastasis in a 12-year-old girl with neurofibromatosis type 1: a case report and literature review. *J Pediatr Orthop B*, 22(2), 110–116. <https://doi.org/10.1097/BPB.0b013e328357eac2>
443. Miró, J., La Vega, R. de, Tomé-Pires, C., Sánchez-Rodríguez, E., Castarlenas, E., Jensen, M. P. & Engel, J. M. (2017). Pain extent and function in youth with physical disabilities. *Journal of Pain Research*, 10, 113–120. <https://doi.org/10.2147/JPR.S121590>
444. Nazar, G. B., Casale, A. J., Roberts, J. G. & Linden, R. D. (1995). Occult filum terminale syndrome. *Pediatric Neurosurgery*, 23(5), 228–235. <https://doi.org/10.1159/000120965>
445. Nguyen, D. K., Agenarioti-Béllanger, S. & Vanasse, M. (1999). Pain and the Guillain-Barre syndrome in children under 6 years old. *Journal of Pediatrics*, 134(6), 773–776.
446. Ogiwara, H., Lyszczyk, A., Alden, T. D., Bowman, R. M., McLone, D. G. & Tomita, T. (2011). Retethering of transected fatty filum terminales. *J Neurosurg Pediatr*, 7(1), 42–46. <https://doi.org/10.3171/2010.10.peds09550>
447. Ostling, L. R., Bierbrauer, K. S. & Kuntz, C. t. (2012). Outcome, reoperation, and complications in 99 consecutive children operated for tight or fatty filum. *World Neurosurg*, 77(1), 187–191. <https://doi.org/10.1016/j.wneu.2011.05.017>

448. Park, D. H., Cho, T. H., Lee, J. B., Park, J. Y., Park, Y. K., Chung, Y. G. & Suh, J. K. (2008). Rapid spontaneous remission of a spontaneous spinal chronic subdural hematoma in a child - Case report. *Neurologia Medico-Chirurgica*, 48(5), 231–234. <https://doi.org/10.2176/nmc.48.231>
449. Robertson, W. C., Jr., Lee, Y. E. & Bruce Edmonson, M. (1979). Spontaneous spinal epidural hematoma in the young. *Neurology*, 29(1), 120–122.
450. Rodriguez, A., Kuhn, E. N., Somasundaram, A. & Couture, D. E. (2015). Management of idiopathic pediatric syringohydromyelia. *J Neurosurg Pediatr*, 16(4), 452–457. <https://doi.org/10.3171/2015.3.peds14433>
451. Rosenberg, O., Itshayek, E. & Israel, Z. (2003). Spontaneous spinal epidural hematoma in a 14-year-old girl: Case report and review of the literature. *Pediatric Neurosurgery*, 38(4), 216–218. <https://doi.org/10.1159/000069091>
452. Sano, H., Satomi, K. & Hirano, J. (2004). Recurrent idiopathic epidural hematoma: A case report. *Journal of Orthopaedic Science*, 9(6), 625–628. <https://doi.org/10.1007/s00776-004-0821-4>
453. Srinivas, H. & Kumar, A. (2014). Silent neurenteric cyst with split cord malformation at conus medullaris: Case report and literature review. *J Pediatr Neurosci*, 9(3), 246–248. <https://doi.org/10.4103/1817-1745.147579>
454. Stanitski, C. L., Micheli, L. J., Hall, J. E. & Rosenthal, R. K. (1982). Surgical correction of spinal deformity in cerebral palsy. *Spine (Phila Pa 1976)*, 7(6), 563–569.
455. Tailor, J., Dunn, I. F. & Smith, E. (2006). Conservative treatment of spontaneous spinal epidural hematoma associated with oral anticoagulant therapy in a child. *Childs Nerv Syst*, 22(12), 1643–1645. <https://doi.org/10.1007/s00381-006-0220-6>
456. Tewari, M. K., Tripathi, L. N., Mathuriya, S. N., Khandelwal, N. & Kak, V. K. (1992). Spontaneous spinal extradural hematoma in children - Report of three cases and a review of the literature. *Child's Nervous System*, 8(1), 53–55. <https://doi.org/10.1007/BF00316564>
457. Tyagi, R., Kloepping, C. & Shah, S. (2016). Spinal cord stimulation for recurrent tethered cord syndrome in a pediatric patient: case report. *J Neurosurg Pediatr*, 18(1), 105–110. <https://doi.org/10.3171/2015.12.peds14645>
458. Wehby, M. C., O'Hollaren, P. S., Abtin, K., Hume, J. L. & Richards, B. J. (2004). Occult tight filum terminale syndrome: Results of surgical untethering. *Pediatric Neurosurgery*, 40(2), 51–57. <https://doi.org/10.1159/000078908>
459. Weissert, M., Gysler, R. & Sorensen, N. (1989) [The clinical problem of the tethered cord syndrome--a report of 3 personal cases]. *Z Kinderchir*, 44(5), 275–279. <https://doi.org/10.1055/s-2008-1043250> (Erstveröffentlichung Zur klinischen Problematik des Tethered-Cord-Syndroms--Bericht über drei eigene Beobachtungen.)
460. Wilmschurst, J. M., Thomas, N. H., Robinson, R. O., Bingham, J. B. & Pohl, K. R. E. (2001). Lower limb and back pain in Guillain-Barré syndrome and associated contrast enhancement in MRI of the cauda equina. *Acta Paediatrica, International Journal of Paediatrics*, 90(6), 691–694.
461. Zhou, Y., Zhu, L., Lin, Y. & Cheng, H. (2017). Chiari type i malformation with occult tethered cord syndrome in a child: A case report. *Medicine (United States)*, 96(40). <https://doi.org/10.1097/MD.00000000000008239>

### ***Rheumatic and inflammatory diseases***

462. Aydin, F., Ozcakar, Z. B., Cakar, N., Celikel, E., Uncu, N., Celikel Acar, B. & Yalcinkaya, F. (2018). Sacroiliitis in Children With Familial Mediterranean Fever. *J Clin Rheumatol*. Epub ahead of print. <https://doi.org/10.1097/rhu.0000000000000770>
463. Binnetoğlu, K. K., Karakoç Aydiner, E., Barış, S., Özen, A., Zöhre, A. İ., Baltacıoğlu, F., Direskeneli, H. & Barlan, I. (2015). Atypical presentation of takayasu's arteritis in an adolescent. *Marmara Medical Journal*, 28(3), 157–160. <https://doi.org/10.5472/MMJcr.2803.01>
464. Bollow, M., Biedermann, T., Kannenberg, J., Paris, S., Schauer-Petrowski, C., Minden, K., Schöntube, M., Hamm, B., Sieper, J. & Braun, J. (1998). Use of dynamic magnetic resonance imaging to detect sacroiliitis in HLA- B27 positive and negative children with juvenile arthritides. *Journal of Rheumatology*, 25(3), 556–564.
465. Brown, R. T. (1981). Costochondritis in adolescents. *Journal of Adolescent Health Care*, 1(3), 198–201. [https://doi.org/10.1016/S0197-0070\(81\)80056-3](https://doi.org/10.1016/S0197-0070(81)80056-3)
466. Burgos-Vargas, R. (2009). A case of childhood-onset ankylosing spondylitis: Diagnosis and treatment. *Nature Clinical Practice Rheumatology*, 5(1), 52–57. <https://doi.org/10.1038/ncprheum0971>
467. Campos, T. A., Rebelo, J., Maia, A. & Brito, I. (2011). Chronic Recurrent Multifocal Osteomyelitis: An entity to Recognize! *Arquivos de Medicina*, 25(5-6), 183–185.
468. Demharter, J., Bohndorf, K., Michl, W. & Vogt, H. (1997). Chronic recurrent multifocal osteomyelitis: A radiological and clinical investigation of five cases. *Skeletal Radiology*, 26(10), 579–588. <https://doi.org/10.1007/s002560050290>
469. Duman, M. A., Duru, N. S., Caliskan, B., Sandikci, H. & Cengel, F. (2016). Lumbar Swelling as the Unusual Presentation of Henoch-Schonlein Purpura in a Child. *Balkan Med J*, 33(3), 360–362. <https://doi.org/10.5152/balkanmedj.2016.150208>
470. Fink, C. W. & Cimaz, R. G. (1995). Back pain as the presenting symptom in juvenile dermatomyositis. *J Clin Rheumatol*, 1(2), 90–92.

471. Fukumori, K., Shakado, S., Miyahara, T., Fukuizumi, K., Takemoto, R., Nishi, H., Sakai, H., Muranaka, T. & Sata, M. (2005). Atypical manifestations of pancreatitis with autoimmune phenomenon in an adolescent female. *Intern Med*, 44(8), 886–891.
472. Gemmel, F., Coningh, A. de, Collins, J. & Rijk, P. (2011). SPECT/CT of osteitis condensans ilii: one-stop shop imaging. *Clin Nucl Med*, 36(1), 59–61. <https://doi.org/10.1097/RLU.0b013e3181feefe8>
473. Girschick, H. J., Mornet, E., Beer, M., Warmuth-Metz, M. & Schneider, P. (2007). Chronic multifocal non-bacterial osteomyelitis in hypophosphatasia mimicking malignancy. *BMC Pediatr*, 7, 3. <https://doi.org/10.1186/1471-2431-7-3>
474. Girschick, H. J., Zimmer, C., Klaus, G., Darge, K., Dick, A. & Morbach, H. (2007). Chronic recurrent multifocal osteomyelitis: What is it and how should it be treated? *Nature Clinical Practice Rheumatology*, 3(12), 733–738. <https://doi.org/10.1038/ncprheum0653>
475. Haddock, G., Coupar, G., Youngson, G. G., MacKinlay, G. A. & Raine, P. A. M. (1994). Acute pancreatitis in children: A 15-year review. *Journal of Pediatric Surgery*, 29(6), 719–722. [https://doi.org/10.1016/0022-3468\(94\)90353-0](https://doi.org/10.1016/0022-3468(94)90353-0)
476. Häfner, R. (1987). Juvenile spondylarthritis - A retrospective study of 71 patients. *Monatsschrift für Kinderheilkunde*, 135(1), 41–46.
477. Horneff, G., Fitter, S., Foeldvari, I., Minden, K., Kuemmerle-Deschner, J., Tzaribacev, N., Thon, A., Borte, M., Ganser, G., Trauzeddel, R. & Huppertz, H. I. (2012). Double-blind, placebo-controlled randomized trial with adalimumab for treatment of juvenile onset ankylosing spondylitis (JoAS): Significant short term improvement. *Arthritis Res Ther*, 14(5), R230. <https://doi.org/10.1186/ar4072>
478. Kekilli, E., Yagmur, C. & Aydin, O. M. (2004). Cervical involvement in juvenile-onset ankylosing spondylitis with bone scintigraphy. *Rheumatology International*, 24(3), 164–165. <https://doi.org/10.1007/s00296-003-0367-3>
479. Moussa, T., Bhat, V., Kini, V. & Fathalla, B. M. (2016). Clinical and genetic association, radiological findings and response to biological therapy in seven children from Qatar with non-bacterial osteomyelitis. *Int J Rheum Dis*. Epub ahead of print. <https://doi.org/10.1111/1756-185x.12940>
480. Pagnini, I., Savelli, S., Matucci-Cerinic, M., Fonda, C., Cimaz, R. & Simonini, G. (2010). Early predictors of juvenile sacroiliitis in enthesitis-related arthritis. *J Rheumatol*, 37(11), 2395–2401. <https://doi.org/10.3899/jrheum.100090>
481. Park, J. H., Seo, Y. M., Han, S. B., Kim, K. H., Rhim, J. W., Chung, N. G., Kim, M. S., Kang, J. H. & Jeong, D. C. (2016). Recurrent macrophage activation syndrome since toddler age in an adolescent boy with HLA B27 positive juvenile ankylosing spondylitis. *Korean J Pediatr*, 59(10), 421–424. <https://doi.org/10.3345/kjp.2016.59.10.421>
482. Stoler, J., Biller, J. A. & Grand, R. J. (1987). Pancreatitis in Kawasaki Disease. *American Journal of Diseases of Children*, 141(3), 306–308. <https://doi.org/10.1001/arch-pedi.1987.04460030084031>
483. Stump, D., Spock, A. & Grossman, H. (1976). Vertebral sarcoidosis in adolescents. *Radiology*, 121(1), 153–155. <https://doi.org/10.1148/121.1.153>
484. Takase, M., Imai, T. & Nozaki, F. (2010). Relapsing autoimmune pancreatitis in a 14-year-old girl. *J Nippon Med Sch*, 77(1), 29–34.
485. Tateyama, T., Waga, S., Suzuki, K., Sugimoto, K., Kakizaki, Y. & Tanaka, H. (2000). Complete occlusion of left renal artery in pediatric-onset Takayasu's arteritis. *Tohoku Journal of Experimental Medicine*, 190(4), 289–294.
486. Toiviainen-Salo, S., Markula-Patjas, K., Kerttula, L., Soini, I., Valt, H. & Mäkitie, O. (2012). The thoracic and lumbar spine in severe juvenile idiopathic arthritis: Magnetic resonance imaging analysis in 50 children. *Journal of Pediatrics*, 160(1), 140–146. <https://doi.org/10.1016/j.jpeds.2011.06.030>
487. Tronconi, E., Miniaci, A., Baldazzi, M., Greco, L. & Pession, A. (2018). Biologic treatment for chronic recurrent multifocal osteomyelitis: report of four cases and review of the literature. *Rheumatology International*, 38(1), 153–160. <https://doi.org/10.1007/s00296-017-3877-0>
488. Tyrrell, P. N. M., Cassar-Pullicino, V. N., Eisenstein, S. M., Monach, J. F., Darby, A. J. & McCall, I. W. (1996). Back pain in childhood. *Annals of the Rheumatic Diseases*, 55(11), 789–793.
489. Vendhan, K., Sen, D., Fisher, C., Ioannou, Y. & Hall-Craggs, M. A. (2014). Inflammatory changes of the lumbar spine in children and adolescents with enthesitis-related arthritis: Magnetic resonance imaging findings. *Arthritis Care and Research*, 66(1), 40–46. <https://doi.org/10.1002/acr.22201>

### **Haematological and vascular diseases**

490. Alonso Fernández, L., Nzau, M. & Ventureyra, E. (2008). Spinal intradural arteriovenous fistula with unusual presentation: Case report and literature review. *Child's Nervous System*, 24(11), 1349–1353. <https://doi.org/10.1007/s00381-008-0656-y>
491. Brekeit, K. A. (2012). Successful repair of a contained rupture of mycotic aortic aneurysm in an 8-year-old child using polytetrafluoroethylene graft. *Saudi Medical Journal*, 33(7), 787–790.

492. Chuang, N. A., Shroff, M. M., Willinsky, R. A., Drake, J. M., Dirks, P. B. & Armstrong, D. C. (2003). Slow-flow spinal epidural AVF with venous ectasias: two pediatric case reports. *AJNR Am J Neuroradiol*, 24(9), 1901–1905.
493. Chun, J. Y., Gulati, M., Halbach, V. & Lawton, M. T. (2004). Thrombosis of a spinal arteriovenous malformation after hemorrhage: Case report. *Surgical Neurology*, 61(1), 92–94. [https://doi.org/10.1016/S0090-3019\(03\)00304-5](https://doi.org/10.1016/S0090-3019(03)00304-5)
494. Griggs, J. R., Bricker, J. T., Mariscalco, M. M., Jefferson, L. S. & Langston, C. (1990). Back pain with cardiovascular collapse in a pediatric emergency department patient. *Pediatr Emerg Care*, 6(1), 17–20.
495. Gupta, G., Singh, R., Kotasthane, D. S., v. d. Kotasthane & Kumar, S. (2010). Xanthogranulomatous Pyelonephritis in a male child with renal vein thrombus extending into the inferior vena cava: A Case Report. *BMC Pediatrics*, 10. <https://doi.org/10.1186/1471-2431-10-47>
496. Nadig, M., Munshi, I., Short, M. P., Tonsgard, J. H., Sullivan, C. & Frim, D. M. (2000). A child with neurofibromatosis-1 and a lumbar epidural arteriovenous malformation. *J Child Neurol*, 15(4), 273–275.
497. Nichols, J. L., Gonzalez, S. C., Bellino, P. J. & Bieber, E. J. (2010). Venous thrombosis and congenital absence of inferior vena cava in a patient with menorrhagia and pelvic pain. *J Pediatr Adolesc Gynecol*, 23(1), e17–21. <https://doi.org/10.1016/j.jpag.2009.04.007>
498. Onur, O., Sivri, A., Gümrük, F. & Altay, C. (1999). Beta thalassaemia: A report of 20 children. *Clinical Rheumatology*, 18(1), 42–44. <https://doi.org/10.1007/s100670050050>
499. Paine, R. S. & Efron, M. L. (1963). Atypical Variants of the 'Ataxia Telangiectasia' Syndrome: Report of Two Cases, Including One with Apparent Dominant Inheritance. *Developmental Medicine & Child Neurology*, 5(1), 14–23. <https://doi.org/10.1111/j.1469-8749.1963.tb04985.x>
500. Petrov, I., Kaneva-Nencheva, A., Levunlieva, E., Genova, K., Garvanski, I., Konstantinov, G. & Adam, G. (2016). Successful endovascular treatment of type B aortic dissection in a 15-year-old child. *Cor et Vasa*. Scopus. <https://doi.org/10.1016/j.crvasa.2016.04.006>
501. Roger, E. & Letts, M. (1999). Sickle cell disease of the spine in children. *Can J Surg*, 42(4), 289–292.
502. Saad, D. F., Gow, K. W., Redd, D., Rausbaum, G. & Wulkan, M. L. (2005). Renal artery pseudoaneurysm secondary to blunt trauma treated with microcoil embolization. *J Pediatr Surg*, 40(11), e65–7. <https://doi.org/10.1016/j.jpedsurg.2005.07.011>
503. Tribe, H. & Borgstein, R. (2013). Dysgenesis of the inferior vena cava associated with deep venous thrombosis and a partial Protein C deficiency. *Journal of Radiology Case Reports*, 7(11), 46–52. <https://doi.org/10.3941/jrcr.v7i11.1485>
504. Vogt, B. A., Birk, P. E., Panzarino, V., Hite, S. H. & Kashtan, C. E. (1999). Aortic dissection in young patients with chronic hypertension. *Am J Kidney Dis*, 33(2), 374–378.
505. Ware, S. M., Shikany, A., Landis, B. J., James, J. F. & Hinton, R. B. (2014). Twins with progressive thoracic aortic aneurysm, recurrent dissection and ACTA2 mutation. *Pediatrics*, 134(4), e1218–23. <https://doi.org/10.1542/peds.2013-2503>
506. Wei, H. Y., Chung, H. T., Wu, C. T. & Huang, J. L. (2011). Aortic dissection complicated with hemothorax in an adolescent patient with systemic lupus erythematosus: Case report and review of literature. *Semin Arthritis Rheum*, 41(1), 12–18. <https://doi.org/10.1016/j.semarthrit.2010.08.002>
507. Yigit, H., Yagmurlu, B., Yigit, N., Fitöz, S. & Kosar, P. (2006). Low back pain as the initial symptom of inferior vena cava agenesis. *AJNR Am J Neuroradiol*, 27(3), 593–595.
508. Zhang, H., He, M. & Mao, B. (2006). Thoracic spine extradural arteriovenous fistula: Case report and review of the literature. *Surg Neurol*, 66(1), S18–23; discussion S23–4. <https://doi.org/10.1016/j.surneu.2006.06.001>

### ***Abdominal and thoracic diseases***

509. Alon, U. S. & Berenbom, A. (2000). Idiopathic hypercalciuria of childhood: 4- to 11-year outcome. *Pediatric Nephrology*, 14(10–11), 1011–1015.
510. Buick, R. G. & Chowdhary, S. K. (1999). Backache: A rare diagnosis and unusual complication. *Pediatric Surgery International*, 15(8), 586–587. <https://doi.org/10.1007/s003830050680>
511. Coscia, M. F., Hormuth, D. A. & Huang, W. L. (1992). Back pain secondary to esophageal perforation in an adolescent. *Spine*, 17(10), 1256–1259.
512. Dane, C., Dane, B., Erginbas, M. & Cetin, A. (2007). Imperforate hymen-a rare cause of abdominal pain: Two cases and review of the literature. *J Pediatr Adolesc Gynecol*, 20(4), 245–247. <https://doi.org/10.1016/j.jpag.2006.12.003>
513. Dasari, P. (2011). Torsion hematosalpinx and paraovarian cyst mimicking bilateral ovarian neoplasm in an adolescent girl. *Journal of Gynecologic Surgery*, 27(4), 285–287. <https://doi.org/10.1089/gyn.2010.0056>
514. Deathe, A. B. (1993). Hematometra as a cause of lumbar radiculopathy. A case report. *Spine (Phila Pa 1976)*, 18(13), 1920–1921.
515. Deeg, K. H. & Mitsioulis, O. (2003). Hematometrocolpos: A rare cause of acute obstructive urinary retention in 3 pubertal girls. *Monatsschrift für Kinderheilkunde*, 151(7), 732–737. <https://doi.org/10.1007/s00112-002-0483-2>

516. Domany, E., Gilad, O., Shwarz, M., Vulfsons, S. & Garty, B. Z. (2013). Imperforate hymen presenting as chronic low back pain. *Pediatrics*, 132(3), e768-70. <https://doi.org/10.1542/peds.2012-1040>
517. Drakonaki, E. E.; Tritou, I.; Pitsoulis, G.; Psaras, K.; Sfakianaki, E. (2010). Hematocolpometra due to an imperforate hymen presenting with back pain: Sonographic diagnosis. Hematocolpometra due to an imperforate hymen presenting with back pain: sonographic diagnosis. E. *J Ultrasound Med.*, 29(2), 321-322. doi: 10.7863/jum.2010.29.2.321
518. Fick, G. M., Duley, I. T., Johnson, A. M., Strain, J. D., Manco-Johnson, M. L. & Gabow, P. A. (1994). The spectrum of autosomal dominant polycystic kidney disease in children. *J Am Soc Nephrol*, 4(9), 1654–1660
519. Igarashi, T., Sekine, T., Sugimura, H., Hayakawa, H. & Arayama, T. (1993). Acute renal failure after exercise in a child with renal hypouricaemia. *Pediatric Nephrology*, 7(3), 292–293. <https://doi.org/10.1007/BF00853226>
520. Lee, Y. J. & Barker, R. (2016). An unusual cause of back pain in a child: Spinal subdural haematoma secondary to intracranial arachnoid cyst haemorrhage. *Quantitative Imaging in Medicine and Surgery*, 6(4), 478–481. <https://doi.org/10.21037/qims.2016.08.02>
521. Letts, M. & Haasbeek, J. (1990). Hematocolpos as a cause of back pain in premenarchal adolescents. *Journal of Pediatric Orthopaedics*, 10(6), 731–732.
522. Löllgen, R. M., Sabo, J., Mettler, A., Liniger, B. & Berger, S. (2016). Unique Presentation of Hematometrocolpos Mimicking Cauda Equina Syndrome: Severe Back Pain and Urinary Incontinence in an Adolescent Girl. *J Emerg Med*, 51(2), e19-23. <https://doi.org/10.1016/j.jemermed.2016.01.031>
523. Malley, M., Monaghan, M., Esmail, A., Neophytou, C. & Cheng, A. (2016). An unusual cause of back pain. *Arch Dis Child Educ Pract Ed*, 101(6), 316–318. <https://doi.org/10.1136/archdischild-2015-308974>
524. Odriozola Grijalba, M., Maduta, T., Villalobos Salguero, F. J., Congost Marín, S., Lalaguna Mallada, P., Vara Callau, M. & Perales Martínez, J. I. (2016). Low back pain in 12-year old adolescent as clinical manifestation of hematocolpos secondary to imperforate hymen. *Revista Espanola de Pediatria*, 72(1), 60–62.
525. Parkhad Suchitra, B., Palve Sachin, B., Latti, R. G. & Kulkarni, N. B. (2013). Effect of yoga on premenstrual and menstrual cycle disorders in adolescent girls. *Biomedicine (India)*, 33(2), 170–175.
526. Wang, W., Chen, M. H., Yang, W. & Hwang, D. L. (2004). Imperforate hymen presenting with chronic constipation and lumbago: Report of one case. *Acta Paediatrica Taiwanica*, 45(6), 340–342.
527. Yekeler, E. & Ulutas, H. (2012). Bilateral chylothorax after severe vomiting in a child. *Ann Thorac Surg*, 94(1), e21-3. <https://doi.org/10.1016/j.athoracsur.2012.01.023>
